# Supplementary material
Source: PubMed Central journal article supplement (PMC4116636)

**Genome-wide association study in Chinese men identifies two new prostate cancer risk loci  
at 9q31.2 and 19q13.4**

Jianfeng Xu<sup>1,2,3,4\*</sup>, Zengnan Mo<sup>5,6\*</sup>, Dingwei Ye<sup>7,8\*</sup>, Meilin Wang<sup>9,10\*</sup>, Fang Liu<sup>1,2\*</sup>, Guangfu Jin<sup>4,10,11,12\*</sup>, Chuanliang Xu<sup>13\*</sup>, Xiang Wang<sup>1</sup>, Qiang Shao<sup>14</sup>, Zhiwen Chen<sup>15</sup>, Zhihua Tao<sup>16</sup>, Jun Qi<sup>17</sup>, Fangjian Zhou<sup>18,19</sup>, Zhong Wang<sup>20</sup>, Yaowen Fu<sup>21</sup>, Dalin He<sup>22</sup>, Qiang Wei<sup>23</sup>, Jianming Guo<sup>24</sup>, Denglong Wu<sup>25</sup>, Xin Gao<sup>26</sup>, Jianlin Yuan<sup>27</sup>, Gongxian Wang<sup>28</sup>, Yong Xu<sup>29</sup>, Guozeng Wang<sup>30</sup>, Haijun Yao<sup>20</sup>, Pei Dong<sup>18,19</sup>, Yang Jiao<sup>17</sup>, Mo Shen<sup>31</sup>, Jin Yang<sup>32</sup>, Jun Ou-Yang<sup>33</sup>, Haowen Jiang<sup>1</sup>, Yao Zhu<sup>7,8</sup>, Shancheng Ren<sup>13</sup>, Zhengdong Zhang<sup>9,10</sup>, Changjun Yin<sup>34</sup>, Xu Gao<sup>13</sup>, Bo Dai<sup>7,8</sup>, Zhibin Hu<sup>10,11,12</sup>, Yajun Yang<sup>35,36</sup>, Qijun Wu<sup>37</sup>, Hongyan Chen<sup>2,3</sup>, Peng Peng<sup>38</sup>, Ying Zheng<sup>38</sup>, Xiaodong Zheng<sup>39,40</sup>, Yongbing Xiang<sup>41</sup>, Jirong Long<sup>42</sup>, Jian Gong<sup>1</sup>, Rong Na<sup>1</sup>, Xiaoling Lin<sup>1,2</sup>, Hongjie Yu<sup>2,3</sup>, Zhong Wang<sup>4</sup>, Sha Tao<sup>4</sup>, Junjie Feng<sup>4</sup>, Jishan Sun<sup>4</sup>, Wennuan Liu<sup>4</sup>, Ann Hsing<sup>43</sup>, Jianyu Rao<sup>44</sup>, Qiang Ding<sup>1</sup>, Fredrik Wiklund<sup>45</sup>, Henrik Gronberg<sup>45</sup>, Xiao-Ou Shu<sup>42</sup>, Wei Zheng<sup>42</sup>, Hongbing Shen<sup>10,11,12</sup>, Li Jin<sup>35,36</sup>, Rong Shi<sup>46</sup>, Daru Lu<sup>2,3,35</sup>, Xuejun Zhang<sup>39,40</sup>, Jielin Sun<sup>2,4</sup>, S. Lilly Zheng<sup>2,4</sup>, Yinghao Sun<sup>13†</sup>

\* Jianfeng Xu, Zengnan Mo, Dingwei Ye, Meilin Wang, Fang Liu, Guangfu Jin & Chuanliang Xu contributed equally to this work.

† Correspondence should be addressed to Y.S. (sunyh@medmail.com.cn).

**Content:**

Supplementary Tables 1-11

Supplementary Figures 1-7

Supplementary Table 1. Characteristics of subjects in the GWAS and subsequent Replications

| Characteristics                 | GWAS               |                       | Replication I    |                       | Replication II     |                       | Replication III    |                       | CAPS               |                      |
|---------------------------------|--------------------|-----------------------|------------------|-----------------------|--------------------|-----------------------|--------------------|-----------------------|--------------------|----------------------|
|                                 | Cases<br>(N=1,417) | Controls<br>(N=1,008) | Cases<br>(N=782) | Controls<br>(N=1,792) | Cases<br>(N=1,102) | Controls<br>(N=4,501) | Cases<br>(N=1,183) | Controls<br>(N=1,633) | Cases<br>(N= 2919) | Controls<br>(N=1612) |
| Age (year) <sup>a</sup>         |                    |                       |                  |                       |                    |                       |                    |                       |                    |                      |
| Mean (SD)                       | 71.3(8.1)          | 62.1(10.0)            | 71.9(8.2)        | 65.5(7.4)             | 71.2(7.8)          | 59.7(16.6)            | 72.9(8.7)          | 55.1(11.3)            | 66.5(7.2)          | 67.2(7.5)            |
| PSA levels (ng/ml) <sup>b</sup> |                    |                       |                  |                       |                    |                       |                    |                       |                    |                      |
| 0-3.99                          | 54(4.0)            | 965(95.9)             | 20(5.2)          | 1750(98.8)            | 33(3.2)            | N/A                   | 29(3.4)            | N/A                   | 146(5.3)           | N/A                  |
| 4-9.99                          | 187(14.0)          | 32(3.2)               | 71(18.5)         | 16(0.9)               | 191(18.4)          | N/A                   | 119(13.8)          | N/A                   | 977(35.5)          | N/A                  |
| 10-19.99                        | 305(22.8)          | 6(0.6)                | 85(22.2)         | 4(0.2)                | 205(19.8)          | N/A                   | 169(19.7)          | N/A                   | 640(23.2)          | N/A                  |
| 20-49.99                        | 312(23.3)          | 3(0.3)                | 88(23.0)         | 0                     | 202(19.5)          | N/A                   | 195(22.7)          | N/A                   | 453(16.5)          | N/A                  |
| 50-99.99                        | 187(14.0)          | 0                     | 47(12.2)         | 1(0.06)               | 150(14.5)          | N/A                   | 95(11.0)           | N/A                   | 226(8.2)           | N/A                  |
| ≥ 100                           | 292(21.9)          | 0                     | 72(18.8)         | 0                     | 257(24.8)          | N/A                   | 253(29.4)          | N/A                   | 312(11.3)          | N/A                  |
| Missing                         | 80                 | 2                     | 399              | 21                    | 64                 | N/A                   | 323                | N/A                   | 165                | N/A                  |
| T-stage                         |                    |                       |                  |                       |                    |                       |                    |                       |                    |                      |
| T1                              | 180(14.7)          | N/A                   | 59(17.9)         | N/A                   | 115(20.8)          | N/A                   | 59(10.5)           | N/A                   | 1057(38.4)         | N/A                  |
| T2                              | 547(44.7)          | N/A                   | 145(44.1)        | N/A                   | 305(55.1)          | N/A                   | 270(48.2)          | N/A                   | 885(32.2)          | N/A                  |
| T3                              | 359(29.4)          | N/A                   | 75(22.8)         | N/A                   | 98(17.7)           | N/A                   | 172(30.7)          | N/A                   | 108(25.7)          | N/A                  |
| T4                              | 137(11.2)          | N/A                   | 50(15.2)         | N/A                   | 36(6.5)            | N/A                   | 59(10.5)           | N/A                   | 102(3.7)           | N/A                  |
| TX                              | 194                | N/A                   | 453              | N/A                   | 548                | N/A                   | 623                | N/A                   | 167                | N/A                  |
| N-stage                         |                    |                       |                  |                       |                    |                       |                    |                       |                    |                      |
| N0                              | 786(68.1)          | N/A                   | 246(74.5)        | N/A                   | 152(30.3)          | N/A                   | 447(79.1)          | N/A                   | 504(84.9)          | N/A                  |
| N1                              | 369(31.9)          | N/A                   | 84(25.5)         | N/A                   | 350(69.7)          | N/A                   | 118(20.9)          | N/A                   | 90(15.1)           | N/A                  |
| NX                              | 262                | N/A                   | 452              | N/A                   | 600                | N/A                   | 618                | N/A                   | 2325               | N/A                  |
| M-stage                         |                    |                       |                  |                       |                    |                       |                    |                       |                    |                      |
| M0                              | 832(65.4)          | N/A                   | 231(68.5)        | N/A                   | 167(27.1)          | N/A                   | 421(65.3)          | N/A                   | 1214(82.0)         | N/A                  |
| M1                              | 440(34.6)          | N/A                   | 106(31.5)        | N/A                   | 450(62.9)          | N/A                   | 224(34.7)          | N/A                   | 267(18.0)          | N/A                  |
| MX                              | 145                | N/A                   | 445              | N/A                   | 485                | N/A                   | 538                | N/A                   | 1438               | N/A                  |
| Gleason score                   |                    |                       |                  |                       |                    |                       |                    |                       |                    |                      |
| <7                              | 355(26.3)          | N/A                   | 162(49.2)        | N/A                   | 304(34.4)          | N/A                   | 119(19.3)          | N/A                   | 1350(52.3)         | N/A                  |
| ≥7                              | 993(73.7)          | N/A                   | 167(50.8)        | N/A                   | 579(65.6)          | N/A                   | 496(80.7)          | N/A                   | 1232(47.7)         | N/A                  |
| Missing                         | 69                 | N/A                   | 453              | N/A                   | 219                | N/A                   | 568                | N/A                   | 337                | N/A                  |

<sup>a</sup> Age at diagnosis for cases or at recruitment for controls;<sup>b</sup> Serum PSA levels were measured at diagnosis for cases or at recruitment for controls.

Supplementary Table 2. Association results in GWAS stage for prostate cancer susceptibility loci identified in populations of European, Japanese or African ancestry.

| Chr                                                 | SNP (alleles)    | Region          | Gene                 | Status    | Risk allele <sup>a</sup> | RAF <sup>b</sup> |         | OR (95%CI) <sup>c</sup> | P <sup>c</sup> |
|-----------------------------------------------------|------------------|-----------------|----------------------|-----------|--------------------------|------------------|---------|-------------------------|----------------|
|                                                     |                  |                 |                      |           |                          | Case             | Control |                         |                |
| Loci identified in populations of European ancestry |                  |                 |                      |           |                          |                  |         |                         |                |
| 2                                                   | rs10187424 (A/G) | 2p11            | <i>GGCX</i>          | Genotyped | A                        | 0.63             | 0.61    | 1.05(0.93-1.18)         | 0.41           |
| 2                                                   | rs1465618 (A/G)  | 2p21            | <i>THADA</i>         | Imputed   | A                        | 0.74             | 0.71    | 1.16(1.02-1.32)         | 0.02           |
| 2                                                   | rs721048 (G/A)   | 2p15            | <i>EHBP1</i>         | Genotyped | A                        | 0.04             | 0.03    | 1.35(0.97-1.89)         | 0.07           |
| 2                                                   | rs7584330 (T/C)  | 2q37            | <i>MLPH</i>          | Genotyped | C                        | 0.74             | 0.73    | 1.08(0.95-1.23)         | 0.26           |
| 2                                                   | rs12621278 (A/G) | 2q31            | <i>ITGA6</i>         | Imputed   | A                        | 0.75             | 0.72    | 1.13(1.00-1.30)         | 0.05           |
| 3                                                   | rs2660753 (C/T)  | 3p12            |                      | Genotyped | T                        | 0.31             | 0.28    | 1.12(0.99-1.27)         | 0.08           |
| 3                                                   | rs10934853 (C/A) | 3q21            |                      | Genotyped | A                        | 0.44             | 0.43    | 1.06(0.94-1.19)         | 0.34           |
| 3                                                   | rs6763931 (C/T)  | 3q23            | <i>ZBTB38</i>        | Genotyped | T                        | 0.37             | 0.34    | 1.15(1.02-1.30)         | 0.02           |
| 3                                                   | rs10936632 (A/C) | 3q26            |                      | Imputed   | A                        | 0.27             | 0.25    | 1.09(0.94-1.26)         | 0.25           |
| 4                                                   | rs17021918 (C/T) | 4q22            | <i>PDLIM5</i>        | Imputed   | C                        | 0.66             | 0.65    | 1.04(0.92-1.17)         | 0.55           |
| 4                                                   | rs7679673 (A/G)  | 4q24            | <i>TET2</i>          | Genotyped | C                        | 0.21             | 0.19    | 1.16(1.01-1.34)         | 0.04           |
| 5                                                   | rs2121875 (T/G)  | 5p12            | <i>FGF10</i>         | Genotyped | G                        | 0.52             | 0.53    | 0.96(0.86-1.08)         | 0.53           |
| 6                                                   | rs130067 (T/G)   | 6q21            | <i>CCHCR1</i>        | Genotyped | G                        | 0.33             | 0.31    | 0.98(0.86-1.12)         | 0.79           |
| 6                                                   | rs9364554 (C/T)  | 6q25            | <i>SLC22A3</i>       | Genotyped | T                        | 0.32             | 0.34    | 0.90(0.80-1.02)         | 0.09           |
| 7                                                   | rs10486567 (T/C) | 7p15            | <i>JAZF1</i>         | Imputed   | C                        | 0.15             | 0.13    | 1.24(1.04-1.47)         | 0.01           |
| 7                                                   | rs6465657 (C/T)  | 7q21            | <i>LMTK2</i>         | Genotyped | C                        | 0.87             | 0.86    | 1.14(0.97-1.36)         | 0.12           |
| 8                                                   | rs2928679 (G/A)  | 8p21            | <i>NKX3.1</i>        | Genotyped | A                        | 0.13             | 0.12    | 1.14(0.95-1.35)         | 0.16           |
| 8                                                   | rs1512268 (G/A)  | 8p21            | <i>NKX3.1</i>        | Genotyped | A                        | 0.32             | 0.28    | 1.26(1.11-1.43)         | 4.82E-4        |
| 8                                                   | rs10086908 (T/C) | 8q24 (Region 5) |                      | Genotyped | T                        | 0.83             | 0.82    | 1.08(0.93-1.26)         | 0.31           |
| 8                                                   | rs16901979 (C/A) | 8q24 (Region 2) |                      | Imputed   | A                        | 0.34             | 0.26    | 1.41(1.24-1.60)         | 1.44E-7        |
| 8                                                   | rs16902094 (A/G) | 8q24.21         |                      | N/A       | G                        |                  |         |                         |                |
| 8                                                   | rs620861 (G/A)   | 8q24 (Region 4) |                      | N/A       | G                        |                  |         |                         |                |
| 8                                                   | rs6983267 (T/G)  | 8q24 (Region 3) |                      | Genotyped | G                        | 0.47             | 0.41    | 1.22(1.09-1.37)         | 7.27E-4        |
| 8                                                   | rs1447295 (C/A)  | 8q24 (Region 1) |                      | Genotyped | A                        | 0.20             | 0.15    | 1.41(1.20-1.64)         | 1.77E-5        |
| 9                                                   | rs1571801 (G/T)  | 9q33            | <i>DAB2IP</i>        | Genotyped | T                        | 0.05             | 0.05    | 1.07(0.82-1.38)         | 0.63           |
| 10                                                  | rs10993994 (T/C) | 10q11           | <i>MSMB</i>          | Genotyped | T                        | 0.51             | 0.48    | 1.11(0.99-1.25)         | 0.07           |
| 10                                                  | rs4962416 (A/G)  | 10q26           | <i>CTBP2</i>         | N/A       | G                        |                  |         |                         |                |
| 11                                                  | rs7127900 (G/A)  | 11p15           | <i>IGF2/IGF2AS</i>   | Genotyped | A                        | 0.11             | 0.12    | 0.87(0.72-1.03)         | 0.11           |
| 11                                                  | rs12418451 (G/A) | 11q13           |                      | Imputed   | A                        | 0.05             | 0.05    | 1.11(0.85-1.46)         | 0.44           |
| 11                                                  | rs10896449 (A/G) | 11q13           |                      | Genotyped | G                        | 0.10             | 0.08    | 1.19(0.97-1.45)         | 0.10           |
| 12                                                  | rs10875943 (T/C) | 12q13           |                      | Genotyped | C                        | 0.85             | 0.85    | 1.03(0.88-1.21)         | 0.70           |
| 17                                                  | rs11649743 (C/T) | 17q12           | <i>HNF1B</i>         | Genotyped | C                        | 0.69             | 0.67    | 1.07(0.95-1.22)         | 0.26           |
| 17                                                  | rs4430796 (T/C)  | 17q12           | <i>HNF1B</i>         | Genotyped | T                        | 0.74             | 0.72    | 1.09(0.96-1.25)         | 0.18           |
| 17                                                  | rs1859962 (T/G)  | 17q24           |                      | Imputed   | G                        | 0.43             | 0.40    | 1.12(1.00-1.26)         | 0.06           |
| 19                                                  | rs8102476 (A/G)  | 19q13           |                      | Genotyped | G                        | 0.37             | 0.36    | 1.05(0.94-1.19)         | 0.35           |
| 19                                                  | rs887391 (T/C)   | 19q13           |                      | Imputed   | T                        | 0.61             | 0.59    | 1.03(0.92-1.16)         | 0.56           |
| 19                                                  | rs2735839 (G/A)  | 19q13           | <i>KLK2/KLK3</i>     | Genotyped | G                        | 0.61             | 0.62    | 0.98(0.87-1.10)         | 0.73           |
| 22                                                  | rs9623117 (T/C)  | 22q13           | <i>TNRC6B</i>        | Imputed   | C                        | 0.04             | 0.03    | 1.15(0.85-1.56)         | 0.37           |
| 22                                                  | rs5759167 (G/T)  | 22q13           | <i>TLL1/BIK</i>      | Genotyped | G                        | 0.73             | 0.71    | 1.11(0.98-1.27)         | 0.11           |
| X                                                   | rs5945619 (A/G)  | Xp11            | <i>NUDT10/NUDT11</i> | N/A       | G                        |                  |         |                         |                |
| Loci identified in populations of Japanese ancestry |                  |                 |                      |           |                          |                  |         |                         |                |
| 2                                                   | rs13385191 (G/A) | 2p24            | <i>C2orf43</i>       | Imputed   | G                        | 0.46             | 0.44    | 1.10(0.97-1.23)         | 0.13           |
| 3                                                   | rs2055109 (T/C)  | 3p11            |                      | Genotyped | C                        | 0.08             | 0.07    | 1.20(0.96-1.49)         | 0.11           |
| 5                                                   | rs12653946 (C/T) | 5p15            | <i>IRX4</i>          | Genotyped | T                        | 0.41             | 0.36    | 1.24(1.10-1.39)         | 3.86E-4        |
| 6                                                   | rs1983891 (C/T)  | 6p21            | <i>FOXP4</i>         | Imputed   | T                        | 0.34             | 0.33    | 1.04(0.91-1.18)         | 0.55           |
| 6                                                   | rs339331 (T/C)   | 6q22            | <i>GPRC6A/RFX6</i>   | Genotyped | T                        | 0.69             | 0.64    | 1.27(1.12-1.43)         | 1.52E-4        |
| 10                                                  | rs2252004 (G/T)  | 10q26           |                      | Imputed   | G                        | 0.77             | 0.74    | 1.20(1.04-1.41)         | 0.01           |
| 11                                                  | rs1938781 (T/C)  | 11q12           | <i>FAM111A</i>       | Imputed   | C                        | 0.33             | 0.31    | 1.11(0.98-1.26)         | 0.11           |
| 13                                                  | rs9600079 (G/T)  | 13q22           |                      | Genotyped | T                        | 0.49             | 0.44    | 1.19(1.06-1.34)         | 3.75E-3        |
| Locus identified in populations of African ancestry |                  |                 |                      |           |                          |                  |         |                         |                |
| 17                                                  | rs7210100 (G/A)  | 17q21           | <i>ZNF652</i>        | N/A       | A                        |                  |         |                         |                |

<sup>a</sup>Reported risk allele; <sup>b</sup>Risk allele frequency; <sup>c</sup>Derived from additive model with adjustment for age and top eigen.

Supplementary Table 3. Selected SNPs suggestively associated with prostate cancer risk in the GWAS stage and from Replication I.

| Chr. | SNP        | Position  | Alleles <sup>a</sup> | GWAS (N <sub>case/control</sub> =1,417/1,008) |                                        |                               | Replication I (N <sub>case/control</sub> =782/1,792) |                                        |                               | Combined                               |                               |
|------|------------|-----------|----------------------|-----------------------------------------------|----------------------------------------|-------------------------------|------------------------------------------------------|----------------------------------------|-------------------------------|----------------------------------------|-------------------------------|
|      |            |           |                      | MAF <sub>case/control/ref.</sub> <sup>b</sup> | OR <sub>add</sub> (95%CI) <sup>c</sup> | P <sub>add</sub> <sup>c</sup> | MAF <sub>case/control</sub> <sup>d</sup>             | OR <sub>add</sub> (95%CI) <sup>c</sup> | P <sub>add</sub> <sup>c</sup> | OR <sub>add</sub> (95%CI) <sup>e</sup> | P <sub>add</sub> <sup>e</sup> |
| 1    | rs4650310  | 69218513  | A/G                  | 0.161/0.206/0.204                             | 0.75(0.65 - 0.87)                      | 1.43E-04                      | 0.175/0.184                                          | 0.94(0.80 - 1.10)                      | 0.434                         | 0.84(0.75 - 0.93)                      | 9.64E-04                      |
| 1    | rs1465132  | 104260408 | C/T                  | 0.269/0.317/0.313                             | 0.80(0.70 - 0.90)                      | 4.06E-04                      | 0.302/0.284                                          | 1.09(0.96 - 1.24)                      | 0.190                         | 0.93(0.85 - 1.02)                      | 0.103                         |
| 1    | rs12130030 | 161465956 | C/T                  | 0.068/0.099/0.086                             | 0.68(0.55 - 0.83)                      | 2.20E-04                      | 0.086/0.066                                          | 1.32(1.06 - 1.65)                      | 0.013                         | 0.93(0.80 - 1.08)                      | 0.332                         |
| 1    | rs12029534 | 219622780 | A/G                  | 0.196/0.236/0.224                             | 0.79(0.69 - 0.91)                      | 7.97E-04                      | 0.197/0.208                                          | 0.93(0.80 - 1.08)                      | 0.354                         | 0.85(0.77 - 0.94)                      | 2.06E-03                      |
| 1    | rs12023401 | 227400917 | A/G                  | 0.120/0.160/0.141                             | 0.70(0.60 - 0.83)                      | 4.22E-05                      | 0.128/0.134                                          | 0.95(0.79 - 1.13)                      | 0.533                         | 0.81(0.72 - 0.91)                      | 6.73E-04                      |
| 1    | rs6685619  | 235198820 | G/T                  | 0.344/0.392/0.389                             | 0.81(0.72 - 0.92)                      | 8.63E-04                      | 0.404/0.374                                          | 1.14(1.01 - 1.28)                      | 0.041                         | 0.96(0.88 - 1.05)                      | 0.374                         |
| 1    | rs6429451  | 242394714 | G/A                  | 0.381/0.446/0.429                             | 0.75(0.66 - 0.84)                      | 1.50E-06                      | 0.405/0.397                                          | 1.04(0.92 - 1.17)                      | 0.574                         | 0.88(0.81 - 0.96)                      | 2.46E-03                      |
| 2    | rs992618   | 45241278  | T/C                  | 0.337/0.391/0.379                             | 0.80(0.71 - 0.91)                      | 3.08E-04                      | 0.335/0.367                                          | 0.87(0.77 - 0.99)                      | 0.031                         | 0.84(0.77 - 0.91)                      | 4.06E-05                      |
| 2    | rs7580494  | 62635003  | C/T                  | 0.435/0.379/0.398                             | 1.27(1.13 - 1.43)                      | 7.82E-05                      | 0.411/0.407                                          | 1.02(0.90 - 1.15)                      | 0.784                         | 1.14(1.05 - 1.24)                      | 2.67E-03                      |
| 2    | rs264927   | 103647704 | C/T                  | 0.381/0.332/0.329                             | 1.23(1.09 - 1.39)                      | 6.89E-04                      | 0.371/0.360                                          | 1.05(0.93 - 1.19)                      | 0.447                         | 1.14(1.04 - 1.24)                      | 3.16E-03                      |
| 2    | rs16823914 | 183567718 | T/C                  | 0.169/0.211/0.200                             | 0.77(0.66 - 0.89)                      | 3.28E-04                      | 0.195/0.174                                          | 1.15(0.99 - 1.34)                      | 0.067                         | 0.93(0.84 - 1.03)                      | 0.186                         |
| 3    | rs6796957  | 66889884  | A/G                  | 0.442/0.383/0.402                             | 1.28(1.13 - 1.44)                      | 5.21E-05                      | 0.424/0.406                                          | 1.08(0.95 - 1.21)                      | 0.239                         | 1.17(1.08 - 1.28)                      | 2.07E-04                      |
| 3    | rs9836404  | 87254695  | G/A                  | 0.153/0.119/0.122                             | 1.34(1.13 - 1.59)                      | 6.01E-04                      | 0.148/0.127                                          | 1.20(1.01 - 1.42)                      | 0.041                         | 1.27(1.12 - 1.43)                      | 1.05E-04                      |
| 3    | rs4280673  | 123008797 | C/T                  | 0.091/0.061/0.051                             | 1.55(1.23 - 1.95)                      | 2.01E-04                      | 0.024/0.025                                          | 0.96(0.65 - 1.41)                      | 0.819                         | 1.37(1.12 - 1.67)                      | 2.00E-03                      |
| 3    | rs2335052  | 129687641 | C/T                  | 0.345/0.401/0.415                             | 0.79(0.70 - 0.89)                      | 8.38E-05                      | 0.382/0.411                                          | 0.89(0.79 - 1.00)                      | 0.058                         | 0.84(0.77 - 0.91)                      | 3.40E-05                      |
| 3    | rs9824588  | 154505470 | C/T                  | 0.131/0.086/0.099                             | 1.61(1.33 - 1.96)                      | 1.39E-06                      | 0.107/0.104                                          | 1.04(0.85 - 1.26)                      | 0.718                         | 1.30(1.13 - 1.49)                      | 2.19E-04                      |
| 4    | rs753972   | 106573233 | G/A                  | 0.297/0.355/0.339                             | 1.27(0.66 - 0.86)                      | 1.43E-05                      | 0.347/0.330                                          | 1.02(0.90 - 1.22)                      | 0.239                         | 0.91(0.83 - 0.99)                      | 0.029                         |
| 4    | rs11728665 | 146451823 | T/C                  | 0.446/0.403/0.409                             | 1.22(1.09 - 1.38)                      | 7.95E-04                      | 0.433/0.428                                          | 1.02(0.91 - 1.15)                      | 0.723                         | 1.12(1.03 - 1.22)                      | 8.14E-03                      |
| 4    | rs7692951  | 166636093 | A/G                  | 0.317/0.260/0.280                             | 1.31(1.15 - 1.49)                      | 4.03E-05                      | 0.298/0.291                                          | 1.03(0.91 - 1.18)                      | 0.616                         | 1.17(1.06 - 1.28)                      | 1.05E-03                      |
| 5    | rs6881843  | 31116520  | T/G                  | 0.186/0.141/0.155                             | 1.41(1.20 - 1.66)                      | 2.55E-05                      | 0.167/0.160                                          | 1.05(0.90 - 1.23)                      | 0.543                         | 1.22(1.09 - 1.36)                      | 6.70E-04                      |
| 6    | rs898165   | 21316408  | G/A                  | 0.198/0.244/0.229                             | 0.77(0.67 - 0.89)                      | 3.69E-04                      | 0.051/0.047                                          | 1.10(0.84 - 1.45)                      | 0.484                         | 0.83(0.74 - 0.94)                      | 4.41E-03                      |
| 6    | rs13218904 | 153997386 | A/G                  | 0.310/0.357/0.375                             | 0.82(0.72 - 0.92)                      | 9.93E-04                      | 0.338/0.330                                          | 1.04(0.91 - 1.17)                      | 0.594                         | 0.91(0.84 - 1.00)                      | 0.045                         |
| 7    | rs9691259  | 46213105  | A/G                  | 0.233/0.292/0.272                             | 0.75(0.66 - 0.86)                      | 2.07E-05                      | 0.238/0.260                                          | 0.89(0.77 - 1.02)                      | 0.093                         | 0.81(0.74 - 0.90)                      | 2.08E-05                      |
| 8    | rs2980945  | 6703161   | A/G                  | 0.190/0.155/0.163                             | 1.31(1.12 - 1.53)                      | 6.28E-04                      | 0.181/0.162                                          | 1.14(0.98 - 1.34)                      | 0.098                         | 1.22(1.10 - 1.37)                      | 3.25E-04                      |
| 8    | rs2241881  | 70661462  | T/C                  | 0.181/0.144/0.149                             | 1.33(1.13 - 1.56)                      | 4.90E-04                      | 0.161/0.159                                          | 1.02(0.86 - 1.19)                      | 0.849                         | 1.17(1.04 - 1.31)                      | 8.50E-03                      |
| 9    | rs817826   | 109196121 | T/C                  | 0.107/0.075/0.084                             | 1.43(1.16 - 1.77)                      | 6.82E-04                      | 0.110/0.082                                          | 1.39(1.14 - 1.70)                      | 1.05E-03                      | 1.41(1.22 - 1.63)                      | 2.40E-06                      |
| 11   | rs1919302  | 14089869  | A/G                  | 0.189/0.148/0.157                             | 1.30(1.11 - 1.52)                      | 8.93E-04                      | 0.179/0.152                                          | 1.22(1.04 - 1.42)                      | 0.016                         | 1.26(1.13 - 1.41)                      | 4.95E-05                      |
| 11   | rs10742620 | 42253844  | G/T                  | 0.214/0.255/0.245                             | 0.79(0.69 - 0.91)                      | 6.85E-04                      | 0.238/0.250                                          | 0.94(0.82 - 1.08)                      | 0.371                         | 0.86(0.78 - 0.95)                      | 2.24E-03                      |
| 11   | rs7944576  | 88738911  | C/T                  | 0.149/0.198/0.184                             | 0.72(0.62 - 0.84)                      | 3.65E-05                      | 0.167/0.182                                          | 0.90(0.77 - 1.05)                      | 0.190                         | 0.80(0.72 - 0.90)                      | 1.07E-04                      |
| 12   | rs7980991  | 6415678   | A/C                  | 0.450/0.503/0.511                             | 0.80(0.71 - 0.90)                      | 2.18E-04                      | 0.486/0.485                                          | 1.00(0.89 - 1.13)                      | 0.962                         | 0.89(0.82 - 0.97)                      | 8.13E-03                      |
| 12   | rs17124060 | 59366306  | T/G                  | 0.278/0.329/0.317                             | 0.80(0.70 - 0.90)                      | 3.47E-04                      | 0.288/0.312                                          | 0.89(0.78 - 1.01)                      | 0.079                         | 0.84(0.77 - 0.92)                      | 1.47E-04                      |
| 14   | rs3742943  | 104679609 | C/T                  | 0.145/0.189/0.180                             | 0.74(0.63 - 0.86)                      | 1.32E-04                      | 0.185/0.170                                          | 1.11(0.95 - 1.30)                      | 0.180                         | 0.90(0.81 - 1.01)                      | 0.075                         |
| 15   | rs1563894  | 66422829  | A/G                  | 0.114/0.150/0.144                             | 0.74(0.62 - 0.87)                      | 3.87E-04                      | 0.124/0.128                                          | 0.96(0.81 - 1.15)                      | 0.689                         | 0.84(0.74 - 0.95)                      | 4.29E-03                      |
| 19   | rs7260240  | 6271963   | G/A                  | 0.139/0.101/0.121                             | 1.43(1.20 - 1.72)                      | 9.73E-05                      | 0.136/0.122                                          | 1.13(0.95 - 1.35)                      | 0.160                         | 1.27(1.12 - 1.44)                      | 1.98E-04                      |
| 19   | rs103294   | 59489660  | T/C                  | 0.301/0.242/0.249                             | 1.28(1.12 - 1.45)                      | 2.94E-04                      | 0.304/0.237                                          | 1.40(1.23 - 1.60)                      | 4.98E-07                      | 1.34(1.22 - 1.47)                      | 9.88E-10                      |
| X    | rs5978499  | 12116360  | G/A                  | 0.428/0.351/--                                | 1.38(1.16 - 1.63)                      | 1.83E-04                      | 0.345/0.384                                          | 0.84(0.71 - 1.01)                      | 0.056                         | 1.09(0.97 - 1.23)                      | 0.166                         |
| X    | rs1476499  | 12124778  | G/A                  | 0.279/0.205/--                                | 1.48(1.22 - 1.80)                      | 6.45E-05                      | 0.212/0.240                                          | 0.85(0.69 - 1.06)                      | 0.155                         | 1.16(1.01 - 1.34)                      | 0.042                         |
| X    | rs3008916  | 39609316  | A/G                  | 0.201/0.265/--                                | 0.70(0.58 - 0.85)                      | 3.09E-04                      | 0.253/0.242                                          | 1.06(0.87 - 1.29)                      | 0.545                         | 0.86(0.75 - 0.99)                      | 0.034                         |
| X    | rs12688535 | 62663781  | A/G                  | 0.298/0.376/--                                | 0.70(0.59 - 0.84)                      | 7.03E-05                      | 0.322/0.337                                          | 0.93(0.78 - 1.12)                      | 0.463                         | 0.81(0.71 - 0.91)                      | 7.35E-04                      |
| X    | rs17279546 | 87285589  | A/G                  | 0.131/0.186/--                                | 0.67(0.54 - 0.84)                      | 4.72E-04                      | 0.124/0.146                                          | 0.82(0.64 - 1.07)                      | 0.139                         | 0.73(0.62 - 0.87)                      | 3.07E-04                      |
| X    | rs11093017 | 87378976  | G/A                  | 0.067/0.110/--                                | 0.58(0.44 - 0.78)                      | 2.40E-04                      | 0.091/0.078                                          | 1.19(0.88 - 1.60)                      | 0.256                         | 0.82(0.67 - 1.01)                      | 0.064                         |
| X    | rs12014732 | 91407032  | G/A                  | 0.291/0.358/--                                | 0.74(0.62 - 0.88)                      | 7.62E-04                      | 0.322/0.341                                          | 0.92(0.77 - 1.10)                      | 0.339                         | 0.82(0.73 - 0.93)                      | 2.06E-03                      |
| X    | rs3924343  | 102527323 | G/A                  | 0.286/0.361/--                                | 0.71(0.60 - 0.84)                      | 1.09E-04                      | 0.317/0.338                                          | 0.91(0.76 - 1.09)                      | 0.309                         | 0.80(0.71 - 0.91)                      | 4.81E-04                      |

<sup>a</sup> Major/Minor allele; <sup>b</sup> Minor allele frequency (MAF) among cases and controls in GWAS stage and reported GWAS controls (case/control/ref.); <sup>c</sup> Odds ratios (ORs), 95% confidence intervals (95%CI) and corresponding *P* values were estimated in an additive model; <sup>d</sup> Minor allele frequency (MAF) among cases and controls in Replication I stage; <sup>e</sup> Results from GWAS and Replication I were combined by meta-analysis.

Supplementary Table 4. SNPs at 9q31.2 associated with prostate cancer risk at  $P < 0.01$  in the GWAS stage

| SNP        | Position  | Status    | Alleles <sup>a</sup> | MAF <sup>b</sup> <sub>case/control</sub> | OR <sub>add</sub> (95%CI) <sup>c</sup> | $P_{add}$ <sup>c</sup> | LD <sup>d</sup> | $P_{conditioned}$ <sup>e</sup> |
|------------|-----------|-----------|----------------------|------------------------------------------|----------------------------------------|------------------------|-----------------|--------------------------------|
| rs817864   | 109182469 | Imputed   | G/A                  | 0.346/0.307                              | 1.20(1.06 - 1.36)                      | 4.24E-03               | 0.166           | 0.090                          |
| rs817865   | 109183520 | Imputed   | G/A                  | 0.346/0.305                              | 1.21(1.07 - 1.37)                      | 2.37E-03               | 0.165           | 0.069                          |
| rs817866   | 109183552 | Imputed   | C/T                  | 0.346/0.305                              | 1.21(1.07 - 1.37)                      | 2.37E-03               | 0.165           | 0.069                          |
| rs28414294 | 109183798 | Imputed   | A/G                  | 0.044/0.027                              | 1.57(1.13 - 2.19)                      | 7.73E-03               | 0.393           | 0.710                          |
| rs817867   | 109183892 | Imputed   | T/G                  | 0.346/0.305                              | 1.21(1.07 - 1.37)                      | 2.40E-03               | 0.165           | 0.069                          |
| rs1746814  | 109184113 | Imputed   | C/T                  | 0.346/0.305                              | 1.21(1.07 - 1.37)                      | 2.40E-03               | 0.165           | 0.069                          |
| rs817868   | 109184208 | Imputed   | A/T                  | 0.347/0.306                              | 1.21(1.07 - 1.37)                      | 2.50E-03               | 0.167           | 0.072                          |
| rs817869   | 109184256 | Imputed   | T/C                  | 0.347/0.306                              | 1.21(1.07 - 1.37)                      | 2.34E-03               | 0.167           | 0.069                          |
| rs817870   | 109184509 | Genotyped | T/C                  | 0.348/0.308                              | 1.20(1.06 - 1.36)                      | 3.27E-03               | 0.165           | 0.086                          |
| rs7870307  | 109184767 | Imputed   | T/C                  | 0.351/0.311                              | 1.20(1.06 - 1.36)                      | 4.33E-03               | 0.166           | 0.097                          |
| rs4366138  | 109184882 | Imputed   | T/C                  | 0.347/0.306                              | 1.21(1.07 - 1.37)                      | 2.34E-03               | 0.167           | 0.069                          |
| rs2417788  | 109184918 | Imputed   | C/T                  | 0.347/0.306                              | 1.21(1.07 - 1.37)                      | 2.31E-03               | 0.167           | 0.068                          |
| rs1746815  | 109185022 | Imputed   | C/T                  | 0.347/0.306                              | 1.21(1.07 - 1.37)                      | 2.31E-03               | 0.167           | 0.068                          |
| rs1746816  | 109185147 | Imputed   | C/A                  | 0.347/0.305                              | 1.21(1.07 - 1.37)                      | 2.23E-03               | 0.167           | 0.066                          |
| rs1746817  | 109185202 | Imputed   | G/A                  | 0.347/0.306                              | 1.21(1.07 - 1.37)                      | 2.31E-03               | 0.167           | 0.068                          |
| rs1771727  | 109185554 | Imputed   | G/C                  | 0.347/0.306                              | 1.21(1.07 - 1.37)                      | 2.31E-03               | 0.167           | 0.068                          |
| rs1323804  | 109186054 | Imputed   | G/A                  | 0.347/0.306                              | 1.21(1.07 - 1.37)                      | 2.48E-03               | 0.167           | 0.071                          |
| rs1323805  | 109186118 | Imputed   | G/T                  | 0.347/0.306                              | 1.21(1.07 - 1.37)                      | 2.48E-03               | 0.167           | 0.071                          |
| rs12348903 | 109186290 | Imputed   | C/T                  | 0.347/0.306                              | 1.21(1.07 - 1.37)                      | 2.48E-03               | 0.167           | 0.071                          |
| rs12336356 | 109186300 | Imputed   | T/C                  | 0.347/0.306                              | 1.21(1.07 - 1.37)                      | 2.48E-03               | 0.167           | 0.071                          |
| rs10978820 | 109186310 | Imputed   | G/A                  | 0.348/0.307                              | 1.20(1.07 - 1.36)                      | 3.05E-03               | 0.167           | 0.079                          |
| rs4978922  | 109186451 | Imputed   | G/A                  | 0.347/0.305                              | 1.21(1.07 - 1.37)                      | 2.52E-03               | 0.170           | 0.080                          |
| rs4978923  | 109186599 | Imputed   | A/C                  | 0.346/0.305                              | 1.21(1.07 - 1.37)                      | 2.60E-03               | 0.170           | 0.079                          |
| rs4978924  | 109186659 | Imputed   | G/A                  | 0.347/0.305                              | 1.21(1.07 - 1.37)                      | 2.64E-03               | 0.170           | 0.082                          |
| rs10114711 | 109186875 | Imputed   | T/C                  | 0.347/0.305                              | 1.21(1.07 - 1.37)                      | 2.57E-03               | 0.170           | 0.079                          |
| rs10123735 | 109187061 | Imputed   | G/A                  | 0.345/0.305                              | 1.20(1.06 - 1.36)                      | 3.80E-03               | 0.170           | 0.093                          |
| rs28649013 | 109187212 | Imputed   | A/G                  | 0.34/0.3                                 | 1.20(1.06 - 1.36)                      | 4.06E-03               | 0.175           | 0.105                          |
| rs12156485 | 109187268 | Imputed   | C/A                  | 0.34/0.3                                 | 1.20(1.06 - 1.36)                      | 4.17E-03               | 0.175           | 0.108                          |
| rs12156453 | 109187323 | Imputed   | C/T                  | 0.34/0.3                                 | 1.20(1.06 - 1.36)                      | 4.17E-03               | 0.175           | 0.108                          |
| rs11794415 | 109187420 | Imputed   | C/G                  | 0.346/0.305                              | 1.20(1.06 - 1.36)                      | 3.59E-03               | 0.171           | 0.089                          |
| rs1617227  | 109187446 | Imputed   | T/C                  | 0.335/0.296                              | 1.20(1.06 - 1.36)                      | 5.36E-03               | 0.181           | 0.140                          |
| rs1746821  | 109187726 | Imputed   | G/A                  | 0.34/0.3                                 | 1.20(1.06 - 1.36)                      | 4.17E-03               | 0.175           | 0.108                          |
| rs1746822  | 109188006 | Imputed   | G/A                  | 0.335/0.295                              | 1.21(1.06 - 1.37)                      | 3.89E-03               | 0.166           | 0.128                          |
| rs1746823  | 109188131 | Imputed   | C/T                  | 0.337/0.296                              | 1.21(1.07 - 1.38)                      | 2.86E-03               | 0.176           | 0.083                          |
| rs1746824  | 109188193 | Imputed   | T/C                  | 0.34/0.3                                 | 1.20(1.06 - 1.36)                      | 4.17E-03               | 0.175           | 0.108                          |
| rs1746825  | 109188377 | Imputed   | C/T                  | 0.34/0.3                                 | 1.20(1.06 - 1.36)                      | 3.97E-03               | 0.175           | 0.105                          |
| rs1771726  | 109188412 | Imputed   | A/G                  | 0.34/0.3                                 | 1.20(1.06 - 1.36)                      | 3.97E-03               | 0.175           | 0.105                          |
| rs1771725  | 109188634 | Imputed   | T/A                  | 0.34/0.3                                 | 1.20(1.06 - 1.36)                      | 3.97E-03               | 0.175           | 0.105                          |
| rs1746826  | 109188712 | Imputed   | G/A                  | 0.34/0.3                                 | 1.20(1.06 - 1.36)                      | 3.97E-03               | 0.175           | 0.105                          |
| rs1746827  | 109188989 | Imputed   | G/A                  | 0.339/0.3                                | 1.20(1.06 - 1.36)                      | 5.05E-03               | 0.180           | 0.145                          |
| rs1746828  | 109189133 | Imputed   | T/C                  | 0.343/0.304                              | 1.20(1.06 - 1.35)                      | 4.82E-03               | 0.175           | 0.131                          |
| rs1746829  | 109189163 | Imputed   | T/A                  | 0.343/0.301                              | 1.21(1.07 - 1.38)                      | 2.79E-03               | 0.180           | 0.099                          |
| rs1622267  | 109190480 | Genotyped | G/A                  | 0.197/0.161                              | 1.25(1.08 - 1.45)                      | 3.62E-03               | 0.345           | 0.256                          |
| rs1771716  | 109191394 | Imputed   | G/C                  | 0.196/0.157                              | 1.28(1.10 - 1.49)                      | 1.55E-03               | 0.350           | 0.191                          |
| rs1746831  | 109191435 | Imputed   | G/T                  | 0.3/0.257                                | 1.24(1.09 - 1.42)                      | 1.58E-03               | 0.231           | 0.095                          |
| rs1771715  | 109191489 | Imputed   | G/A                  | 0.191/0.153                              | 1.28(1.10 - 1.49)                      | 1.91E-03               | 0.407           | 0.248                          |
| rs817834   | 109191592 | Imputed   | C/T                  | 0.118/0.091                              | 1.32(1.09 - 1.60)                      | 4.84E-03               | 0.107           | 0.076                          |
| rs843865   | 109192688 | Imputed   | G/T                  | 0.043/0.028                              | 1.57(1.12 - 2.18)                      | 8.00E-03               | 0.384           | 0.474                          |
| rs817831   | 109193494 | Imputed   | T/G                  | 0.1/0.07                                 | 1.44(1.16 - 1.79)                      | 9.59E-04               | 0.995           | N/A                            |
| rs1746832  | 109195006 | Imputed   | T/C                  | 0.282/0.236                              | 1.26(1.10 - 1.44)                      | 8.96E-04               | 0.268           | 0.072                          |
| rs1771714  | 109195009 | Imputed   | A/G                  | 0.042/0.026                              | 1.62(1.15 - 2.27)                      | 5.42E-03               | 0.378           | 0.391                          |
| rs817829   | 109195179 | Genotyped | A/G                  | 0.23/0.198                               | 1.22(1.06 - 1.40)                      | 6.67E-03               | 0.029           | 0.029                          |
| rs817827   | 109196100 | Genotyped | T/C                  | 0.473/0.518                              | 0.83(0.74 - 0.94)                      | 2.14E-03               | 0.106           | 0.037                          |
| rs817826   | 109196121 | Genotyped | T/C                  | 0.107/0.075                              | 1.43(1.17 - 1.77)                      | 6.82E-04               | N/A             | N/A                            |
| rs817823   | 109199999 | Imputed   | A/G                  | 0.043/0.026                              | 1.67(1.19 - 2.35)                      | 2.90E-03               | 0.388           | 0.332                          |

<sup>a</sup> Major/Minor allele; <sup>b</sup> Minor allele frequency (MAF) between cases and controls; <sup>c</sup> Odds ratios (ORs), 95% confidence intervals (95%CI) and corresponding  $P$  values were estimated using a logistic regression model with adjustment for age and the top eigen in an additive model; <sup>d</sup> Linkage disequilibrium ( $r$ -square) between each SNP at 9q31.2 and the index SNP of rs817826; <sup>e</sup>  $P$  values were estimated using a logistic regression model after conditioning on rs817826.

Supplementary Table 5. Summary of fine-mapping study at 19q13.4 and association results with prostate cancer risk in all of the samples in the GWAS stage.

| SNP         | Position | Alleles <sup>a</sup> | MAF <sub>case/control</sub> <sup>b</sup> | OR <sub>add</sub> (95%CI) <sup>c</sup> | <i>P</i> <sub>add</sub> <sup>c</sup> | LD <sup>d</sup> | <i>P</i> <sub>conditioned</sub> <sup>e</sup> |
|-------------|----------|----------------------|------------------------------------------|----------------------------------------|--------------------------------------|-----------------|----------------------------------------------|
| rs6509859   | 59454220 | C/T                  | 0.067/0.054                              | 1.21(0.95-1.54)                        | 0.126                                | 0.10/0.08       | 0.62/0.55                                    |
| rs595872    | 59455781 | A/G                  | 0.260/0.220                              | 1.19(1.04-1.37)                        | 0.014                                | 0.30/0.25       | 0.60/0.41                                    |
| rs402071    | 59459691 | C/T                  | 0.152/0.136                              | 1.08(0.91-1.28)                        | 0.390                                | 0.23/0.19       | 0.27/0.41                                    |
| rs17273295  | 59466404 | C/T                  | 0.155/0.142                              | 1.05(0.89-1.24)                        | 0.574                                | 0.22/0.22       | 0.28/0.24                                    |
| rs7254645   | 59467201 | C/T                  | 0.168/0.152                              | 1.06(0.90-1.25)                        | 0.478                                | 0.27/0.22       | 0.13/0.22                                    |
| rs444004    | 59471267 | A/G                  | 0.027/0.026                              | 0.92(0.64-1.32)                        | 0.643                                | 0.06/0.05       | 0.20/0.18                                    |
| rs4022330   | 59473655 | G/A                  | 0.177/0.151                              | 1.17(0.99-1.38)                        | 0.068                                | 0.29/0.28       | 0.95/0.96                                    |
| rs3848607   | 59480959 | G/A                  | 0.151/0.156                              | 0.96(0.82-1.13)                        | 0.640                                | 0.04/0.05       | 0.80/0.54                                    |
| rs8100863   | 59481078 | G/T                  | 0.047/0.035                              | 1.26(0.93-1.71)                        | 0.135                                | 0.11/0.08       | 0.52/0.51                                    |
| rs397600    | 59483600 | C/T                  | 0.079/0.068                              | 1.11(0.88-1.39)                        | 0.394                                | 0.18/0.18       | 0.55/0.51                                    |
| rs6509860   | 59484170 | A/G                  | 0.070/0.061                              | 1.09(0.86-1.38)                        | 0.498                                | 0.17/0.14       | 0.49/0.57                                    |
| rs798887    | 59485000 | G/A                  | 0.150/0.132                              | 1.12(0.93-1.34)                        | 0.236                                | 0.56/0.47       | 0.80/0.67                                    |
| rs117311656 | 59485734 | T/G                  | 0.053/0.050                              | 1.09(0.83-1.42)                        | 0.550                                | 0.13/0.12       | 0.49/0.58                                    |
| rs427366    | 59487111 | C/T                  | 0.096/0.085                              | 1.11(0.91-1.36)                        | 0.303                                | 0.26/0.22       | 0.33/0.45                                    |
| rs17305346  | 59487148 | G/A                  | 0.115/0.090                              | 1.25(1.03-1.52)                        | 0.022                                | 0.31/0.25       | 0.88/0.69                                    |
| rs103294    | 59489660 | T/C                  | 0.301/0.242                              | 1.28(1.12-1.45)                        | 2.94E-04                             | N/A /0.83       | N/A/0.67                                     |
| rs368178    | 59492034 | C/T                  | 0.119/0.087                              | 1.29(1.06-1.57)                        | 0.012                                | 0.27/0.28       | 0.32/0.34                                    |
| rs410852    | 59492183 | C/T                  | 0.119/0.089                              | 1.26(1.04-1.53)                        | 0.021                                | 0.30/0.26       | 0.52/0.54                                    |
| Deletion    | 59492668 | Non-del/Del          | 0.307/0.252                              | 1.25(1.10-1.43)                        | 9.60E-04                             | 0.83/ N/A       | 0.31/N/A                                     |
| rs453755    | 59501155 | C/A                  | 0.215/0.165                              | 1.30(1.12-1.52)                        | 8.43E-04                             | 0.56/0.59       | 0.19/0.25                                    |
| rs117372111 | 59501324 | T/C                  | 0.060/0.064                              | 0.93(0.72-1.18)                        | 0.541                                | 0.01/0.02       | 0.83/0.80                                    |

<sup>a</sup> Major/Minor allele; <sup>b</sup> Minor allele frequency (MAF) between cases and controls; <sup>c</sup> Odds ratios (ORs), 95% confidence intervals (95%CI) and corresponding *P* values were estimated using a logistic regression model in an additive model; <sup>d</sup> Linkage disequilibrium (r-square) between each variant at 19q13.4 and variants of rs103294/deletion, respectively; <sup>e</sup> *P* values were derived from logistic regression with an additive model conditioned by rs103294/deletion, respectively.

Supplementary Table 6. The relationship between rs817826 at 9q31.2 and rs103294 at 19q13.4 and prostate cancer clinical features

| Marker (alleles <sup>a</sup> ) | Phenotype     | MAF <sup>b</sup> |               |                |                 | OR <sub>combined</sub> (95%CI) <sup>c</sup> | P <sub>combined</sub> <sup>c</sup> |
|--------------------------------|---------------|------------------|---------------|----------------|-----------------|---------------------------------------------|------------------------------------|
|                                |               | GWAS             | Replication I | Replication II | Replication III |                                             |                                    |
| rs817826 (T/C)                 | PSA levels    |                  |               |                |                 |                                             |                                    |
|                                | <10 ng/ml     | 0.095            | 0.077         | 0.121          | 0.103           | Ref.                                        |                                    |
|                                | ≥10 ng/ml     | 0.107            | 0.115         | 0.117          | 0.115           | 1.10(0.91-1.34)                             | 0.31                               |
|                                | Gleason score |                  |               |                |                 |                                             |                                    |
|                                | <7            | 0.116            | 0.093         | 0.122          | 0.097           | Ref.                                        |                                    |
|                                | ≥7            | 0.105            | 0.111         | 0.117          | 0.110           | 0.98(0.83-1.17)                             | 0.84                               |
|                                | T-stage       |                  |               |                |                 |                                             |                                    |
|                                | T1-2          | 0.111            | 0.093         | 0.118          | 0.108           | Ref.                                        |                                    |
|                                | T3-4          | 0.100            | 0.120         | 0.090          | 0.109           | 0.94(0.78-1.13)                             | 0.49                               |
|                                | N-stage       |                  |               |                |                 |                                             |                                    |
|                                | N0            | 0.102            | 0.087         | 0.115          | 0.112           | Ref.                                        |                                    |
|                                | N1            | 0.108            | 0.131         | 0.113          | 0.107           | 1.08(0.89-1.32)                             | 0.44                               |
|                                | M-stage       |                  |               |                |                 |                                             |                                    |
|                                | M0            | 0.106            | 0.093         | 0.105          | 1.115           | Ref.                                        |                                    |
| M1                             | 0.105         | 0.118            | 0.11          | 0.105          | 1.01(0.85-1.21) | 0.88                                        |                                    |
| Aggressiveness <sup>e</sup>    |               |                  |               |                |                 |                                             |                                    |
| Nonaggressive                  | 0.113         | 0.103            | 0.120         | 0.097          | Ref.            |                                             |                                    |
| Aggressive                     | 0.106         | 0.113            | 0.115         | 0.115          | 1.01(0.84-1.21) | 0.92                                        |                                    |
| rs103294 (T/C)                 | PSA levels    |                  |               |                |                 |                                             |                                    |
|                                | <10 ng/ml     | 0.295            | 0.330         | 0.255          | 0.277           | Ref.                                        |                                    |
|                                | ≥10 ng/ml     | 0.297            | 0.272         | 0.279          | 0.288           | 1.02(0.89-1.16)                             | 0.80                               |
|                                | Gleason score |                  |               |                |                 |                                             |                                    |
|                                | <7            | 0.320            | 0.283         | 0.252          | 0.298           | Ref.                                        |                                    |
|                                | ≥7            | 0.294            | 0.314         | 0.274          | 0.294           | 1.00(0.88-1.13)                             | 0.97                               |
|                                | T-stage       |                  |               |                |                 |                                             |                                    |
|                                | T1-2          | 0.306            | 0.298         | 0.261          | 0.297           | Ref.                                        |                                    |
|                                | T3-4          | 0.278            | 0.292         | 0.301          | 0.270           | 0.94(0.83-1.06)                             | 0.31                               |
|                                | N-stage       |                  |               |                |                 |                                             |                                    |
|                                | N0            | 0.298            | 0.306         | 0.319          | 0.295           | Ref.                                        |                                    |
|                                | N1            | 0.313            | 0.262         | 0.254          | 0.256           | 0.92(0.80-1.05)                             | 0.20                               |
|                                | M-stage       |                  |               |                |                 |                                             |                                    |
|                                | M0            | 0.297            | 0.294         | 0.299          | 0.282           | Ref.                                        |                                    |
| M1                             | 0.301         | 0.278            | 0.260         | 0.280          | 0.96(0.85-1.09) | 0.52                                        |                                    |
| Aggressiveness <sup>e</sup>    |               |                  |               |                |                 |                                             |                                    |
| Nonaggressive                  | 0.311         | 0.317            | 0.268         | 0.279          | Ref.            |                                             |                                    |
| Aggressive                     | 0.298         | 0.284            | 0.271         | 0.286          | 0.96(0.85-1.09) | 0.54                                        |                                    |

<sup>a</sup> Major alleles/minor alleles; <sup>b</sup> Minor allele frequency (MAF); <sup>c</sup> Combined results from GWAS and replications in additive models by meta-analysis; <sup>d</sup> Odds ratios (ORs) and 95% confidence intervals (95%CI) were estimated using a logistic regression model based on additive model; <sup>e</sup> Patients with a Gleason score of 7 or higher, a stage of T3/T4, N+, or M+, were classified as having aggressive disease, whereas all other patients were classified as having nonaggressive disease.

Supplementary Table 7. Summary results of association with prostate cancer risk at 9q31.2 and 19q13.4 in Populations of European ancestry

| Marker<br>(alleles) | Location<br>(gene)               | Study                 | TT/TC/CC genotypes |             | C allele frequency |          | OR<br>(95%CI) <sup>a</sup> | P <sup>a</sup> |
|---------------------|----------------------------------|-----------------------|--------------------|-------------|--------------------|----------|----------------------------|----------------|
|                     |                                  |                       | Cases              | Controls    | Cases              | Controls |                            |                |
| rs817826<br>(T/C)   | 9q31.2<br>( <i>RAD23B/KLF4</i> ) | CAPS                  | 2160/667/56        | 1241/315/32 | 0.135              | 0.119    | 1.15(1.01-1.31)            | 0.036          |
|                     |                                  | CGEMS                 | 855/299/22         | 816/271/14  | 0.146              | 0.136    | 1.09(0.92-1.29)            | 0.323          |
|                     |                                  | Combined <sup>b</sup> |                    |             |                    |          | 1.13(1.02-1.25)            | 0.023          |
| rs103294<br>(T/C)   | 19q13.4<br>( <i>LILRA3</i> )     | CAPS                  | 177/1117/1590      | 113/580/897 | 0.745              | 0.747    | 0.99(0.90-1.10)            | 0.871          |
|                     |                                  | CGEMS                 | 47/397/732         | 40/370/690  | 0.791              | 0.795    | 0.97(0.84-1.13)            | 0.722          |
|                     |                                  | Combined <sup>b</sup> |                    |             |                    |          | 0.99(0.91-1.07)            | 0.738          |

<sup>a</sup> Odds ratios (ORs), 95% confidence intervals (95%CIs) and corresponding *P* value in additive model (CC versus TC versus TT) were estimated using logistic regression model for additive model; <sup>b</sup> Results in additive model from two studies were combined by meta-analysis using a fixed-effect model under the absence of heterogeneity among studies for both loci (rs817826: *P* = 0.63, *I*<sup>2</sup> = 0; rs103294: *P* = 0.84, *I*<sup>2</sup> = 0).



Supplementary Table 8. Expression quantitative trait loci (eQTL) analysis for rs817826 at 9q31.2 and rs103294 at 19q13.4<sup>a</sup>

| Probe ID            | Gene          | Probe Start | Cell types |                |       | Tissue types (Twin1) |                |       | Tissue types (Twin2) |                |       |  |
|---------------------|---------------|-------------|------------|----------------|-------|----------------------|----------------|-------|----------------------|----------------|-------|--|
|                     |               |             | Fibroblast | Lymphoblastoid | T     | Fat                  | Lymphoblastoid | Skin  | Fat                  | Lymphoblastoid | Skin  |  |
| rs817826 at 9q31.2  |               |             |            |                |       |                      |                |       |                      |                |       |  |
| ILMN_1686679        | <i>ZNF462</i> | 108673302   | 0.296      | 0.588          | 0.005 | 0.833                | 0.276          | 0.339 | 0.176                | 0.203          | 0.333 |  |
| ILMN_1722662        | <i>RAD23B</i> | 109089103   | 0.670      | 0.308          | 0.192 | 0.964                | 0.467          | 0.658 | 0.009                | 0.051          | 0.451 |  |
| ILMN_2137789        | <i>KLF4</i>   | 109289352   | 0.826      | 0.529          | 0.473 | 0.729                | 0.141          | 0.088 | 0.999                | 0.440          | 0.914 |  |
| ILMN_1779857        | <i>KLF4</i>   | 109289583   | 0.717      | 0.340          | 0.410 | 0.043                | 0.157          | 0.718 | 0.702                | 0.558          | 0.426 |  |
| rs103294 at 19q13.4 |               |             |            |                |       |                      |                |       |                      |                |       |  |
| ILMN_2078404        | <i>ZNF765</i> | 58594190    |            |                |       | 0.445                | 0.376          | 0.160 | 0.353                | 0.462          | 0.170 |  |
| ILMN_1764854        | <i>ZNF761</i> | 58652225    | 0.424      | 0.681          | 0.672 | 0.776                | 0.127          | 0.693 | 0.509                | 0.426          | 0.784 |  |
| ILMN_1749809        | <i>ZNF813</i> | 58666798    |            |                |       | 0.591                | 0.013          | 0.442 | 0.430                | 0.356          | 0.314 |  |
| ILMN_2269193        | <i>ZNF331</i> | 58716841    | 0.210      | 0.844          | 0.702 | 0.332                | 0.008          | 0.263 | 0.995                | 0.484          | 0.806 |  |
| ILMN_1711199        | <i>ZNF331</i> | 58719957    | 0.522      | 0.866          | 0.730 | 0.596                | 0.276          | 0.214 | 0.568                | 0.071          | 0.809 |  |
| ILMN_2362232        | <i>ZNF331</i> | 58720480    | 0.957      | 0.735          | 0.748 | 0.914                | 0.983          | 0.653 | 0.099                | 0.743          | 0.354 |  |
| ILMN_2051483        | <i>DPRXP4</i> | 58827413    |            |                |       | 0.122                | 0.754          | 0.677 | 0.753                | 0.748          | 0.968 |  |
| ILMN_1739532        | <i>DPRXP4</i> | 58827508    |            |                |       | 0.906                | 0.011          | 0.295 | 0.380                | 0.458          | 0.118 |  |
| ILMN_1653158        | <i>DPRXP4</i> | 58827689    | 0.745      | 0.599          | 0.153 | 0.592                | 0.678          | 0.287 | 0.006                | 0.315          | 0.640 |  |
| ILMN_1716105        | <i>NLRP12</i> | 59016112    | 0.991      | 0.188          | 0.919 | 0.024                | 0.179          | 0.697 | 0.824                | 0.147          | 0.867 |  |
| ILMN_1758735        | <i>NLRP12</i> | 59016511    | 0.637      | 0.263          | 0.542 | 0.994                | 0.933          | 0.407 | 0.626                | 0.397          | 0.178 |  |
| ILMN_1739815        | <i>NLRP12</i> | 59018880    | 0.760      | 0.180          | 0.892 | 0.087                | 0.185          | 0.778 | 0.737                | 0.372          | 0.678 |  |
| ILMN_1675345        | <i>MYADM</i>  | 59061425    | 0.062      | 0.350          | 0.232 | 0.122                | 0.187          | 0.916 | 0.187                | 0.416          | 0.163 |  |
| ILMN_2350574        | <i>MYADM</i>  | 59064085    | 0.400      | 0.723          | 0.645 | 0.875                | 0.614          | 0.737 | 0.534                | 0.650          | 0.369 |  |
| ILMN_2308849        | <i>MYADM</i>  | 59064217    | 0.234      | 0.161          | 0.110 | 0.383                | 0.323          | 0.845 | 0.112                | 0.069          | 0.548 |  |
| ILMN_1739812        | <i>PRKCG</i>  | 59080125    | 0.006      | 0.801          | 0.142 | 0.529                | 0.858          | 0.402 | 0.367                | 0.872          | 0.872 |  |
| ILMN_1669816        | <i>CACNG7</i> | 59105872    | 0.669      | 0.598          | 0.698 | 0.338                | 0.049          | 0.928 | 0.453                | 0.669          | 0.913 |  |
| ILMN_1776079        | <i>CACNG8</i> | 59158853    | 0.490      | 0.779          | 0.056 | 0.996                | 0.828          | 0.664 | 0.056                | 0.666          | 0.818 |  |
| ILMN_2106874        | <i>CACNG8</i> | 59159437    | 0.425      | 0.944          | 0.018 | 0.555                | 0.385          | 0.882 | 0.191                | 0.746          | 0.915 |  |
| ILMN_1809676        | <i>CACNG6</i> | 59188437    | 0.230      | 0.917          | 0.706 | 0.741                | 0.698          | 0.379 | 0.967                | 0.172          | 0.091 |  |
| ILMN_2356441        | <i>CACNG6</i> | 59188533    | 0.589      | 0.939          | 0.281 | 0.879                | 0.080          | 0.240 | 0.347                | 0.593          | 0.621 |  |
| ILMN_1779043        | <i>CACNG6</i> | 59188874    | 0.483      | 0.092          | 0.636 | 0.947                | 0.432          | 0.919 | 0.095                | 0.585          | 0.832 |  |
| ILMN_1763455        | <i>VSTM1</i>  | 59258264    | 0.364      | 0.009          | 0.359 | 0.824                | 0.676          | 0.556 | 0.146                | 0.152          | 0.354 |  |
| ILMN_1784641        | <i>NDUFA3</i> | 59282252    | 0.793      | 0.458          | 0.363 | 0.085                | 0.185          | 0.218 | 0.888                | 0.402          | 0.866 |  |
| ILMN_2367418        | <i>OSCAR</i>  | 59296737    | 0.992      | 0.431          | 0.719 | 0.698                | 0.742          | 0.949 | 0.041                | 0.435          | 0.483 |  |
| ILMN_1741917        | <i>OSCAR</i>  | 59296829    | 0.241      | 0.115          | 0.875 | 0.965                | 0.341          | 0.736 | 0.372                | 0.896          | 0.928 |  |
| ILMN_1709451        | <i>TFPT</i>   | 59309986    | 0.378      | 0.167          | 0.106 | 0.244                | 0.269          | 0.448 | 0.786                | 0.621          | 0.608 |  |
| ILMN_1719204        | <i>PRPF31</i> | 59312451    | 0.848      | 0.490          | 0.917 | 0.418                | 0.431          | 0.342 | 0.852                | 0.682          | 0.846 |  |
| ILMN_2207393        | <i>CNOT3</i>  | 59335678    | 0.417      | 0.693          | 0.753 | 0.086                | 0.931          | 0.563 | 0.399                | 0.765          | 0.952 |  |
| ILMN_1679238        | <i>LENG1</i>  | 59354714    | 0.709      | 0.295          | 0.128 | 0.346                | 0.370          | 0.399 | 0.063                | 0.804          | 0.890 |  |
| ILMN_1803219        | <i>TMC4</i>   | 59366497    | 0.600      | 0.312          | 0.993 | 0.544                | 0.171          | 0.419 | 0.891                | 0.864          | 0.110 |  |
| ILMN_1722218        | <i>MBOAT7</i> | 59383288    | 0.946      | 0.780          | 0.827 | 0.059                | 0.789          | 0.907 | 0.345                | 0.638          | 0.293 |  |
| ILMN_1673111        | <i>TSEN34</i> | 59387047    | 0.980      | 0.580          | 0.713 | 0.144                | 0.496          | 0.507 | 0.436                | 0.965          | 0.378 |  |
| ILMN_2368292        | <i>TSEN34</i> | 59387266    | 0.414      | 0.666          | 0.341 | 0.249                | 0.599          | 0.965 | 0.326                | 0.994          | 0.546 |  |
| ILMN_2038772        | <i>RPS9</i>   | 59396730    | 0.344      | 0.438          | 0.414 | 0.216                | 0.280          | 0.565 | 0.692                | 0.395          | 0.740 |  |

|              |                 |          |       |       |        |       |       |       |        |       |       |
|--------------|-----------------|----------|-------|-------|--------|-------|-------|-------|--------|-------|-------|
| ILMN_1749447 | <i>RPS9</i>     | 59396734 | 0.329 | 0.731 | 0.279  | 0.340 | 0.411 | 0.822 | 0.421  | 0.351 | 0.609 |
| ILMN_2406132 | <i>LILRB3</i>   | 59416845 | 0.333 | 0.867 | 0.849  | 0.553 | 0.586 | 0.866 | 0.182  | 0.145 | 0.497 |
| ILMN_1784884 | <i>LILRB3</i>   | 59417065 | 0.506 | 0.592 | 0.992  | 0.740 | 0.239 | 0.964 | 0.905  | 0.217 | 0.738 |
| ILMN_2058841 | <i>LILRA6</i>   | 59435687 | 0.288 | 0.665 | 0.915  | 0.680 | 0.382 | 0.876 | 0.937  | 0.421 | 0.331 |
| ILMN_1694243 | <i>LILRA6</i>   | 59437530 | 0.103 | 0.961 | 0.429  | 0.664 | 0.612 | 0.750 | 0.054  | 0.526 | 0.743 |
| ILMN_1651404 | <i>LILRA6</i>   | 59437708 | 0.641 | 0.159 | 0.483  | 0.151 | 0.732 | 0.124 | 0.274  | 0.672 | 0.634 |
| ILMN_2339294 | <i>LILRB5</i>   | 59450972 | 0.144 | 0.049 | 0.247  | 0.882 | 0.696 | 0.665 | 0.342  | 0.283 | 0.235 |
| ILMN_1732919 | <i>LILRB5</i>   | 59451098 | 0.223 | 0.823 | 0.963  | 0.685 | 0.812 | 0.691 | 0.549  | 0.847 | 0.700 |
| ILMN_2312340 | <i>LILRB2</i>   | 59474228 | 0.515 | 0.397 | 0.898  | 0.520 | 0.704 | 0.549 | 0.550  | 0.664 | 0.072 |
| ILMN_1734234 | <i>LILRB2</i>   | 59474679 | 0.256 | 0.524 | 0.417  | 0.488 | 0.732 | 0.300 | 0.301  | 0.676 | 0.931 |
| ILMN_1695744 | <i>LILRB2</i>   | 59476835 | 0.751 | 0.262 | 0.525  | 0.943 | 0.435 | 0.652 | 0.387  | 0.673 | 0.738 |
| ILMN_1661631 | <i>LILRA3</i>   | 59500385 | 0.915 | 0.105 | 2.3E-5 | 0.009 | 0.393 | 0.291 | 5.4E-5 | 0.450 | 0.065 |
| ILMN_1786303 | <i>LILRA3</i>   | 59500609 | 0.023 | 0.100 | 2.5E-5 | 0.341 | 0.936 | 0.776 | 7.1E-3 | 0.131 | 0.984 |
| ILMN_1668588 | <i>LILRA3</i>   | 59501708 |       |       |        | 0.366 | 0.715 | 0.092 | 0.338  | 0.185 | 0.409 |
| ILMN_1726545 | <i>LILRA5</i>   | 59514620 |       |       |        | 0.840 | 0.904 | 0.724 | 0.645  | 0.386 | 0.951 |
| ILMN_2266595 | <i>LILRA5</i>   | 59514912 | 0.429 | 0.167 | 0.940  | 0.334 | 0.313 | 0.800 | 0.306  | 0.196 | 0.092 |
| ILMN_2357419 | <i>LILRA5</i>   | 59515439 | 0.052 | 0.204 | 0.859  | 0.429 | 0.261 | 0.657 | 0.971  | 0.249 | 0.672 |
| ILMN_1702385 | <i>LILRA4</i>   | 59540651 | 0.021 | 0.734 | 0.986  | 0.970 | 0.699 | 0.979 | 0.127  | 0.111 | 0.474 |
| ILMN_2389211 | <i>LAIR1</i>    | 59571384 | 0.889 | 0.580 | 0.032  | 0.151 | 0.853 | 0.216 | 0.110  | 0.252 | 0.923 |
| ILMN_1768598 | <i>LAIR1</i>    | 59573180 | 0.949 | 0.902 | 0.958  | 0.721 | 0.590 | 0.795 | 0.494  | 0.571 | 0.970 |
| ILMN_2351269 | <i>TTYH1</i>    | 59619779 | 0.641 | 0.901 | 0.057  | 0.176 | 0.967 | 0.561 | 0.466  | 0.880 | 0.767 |
| ILMN_1758497 | <i>TTYH1</i>    | 59620110 | 0.965 | 0.819 | 0.005  | 0.192 | 0.320 | 0.933 | 0.464  | 0.587 | 0.619 |
| ILMN_1654890 | <i>LENG8</i>    | 59655481 | 0.499 | 0.308 | 0.190  | 0.355 | 0.270 | 0.913 | 0.892  | 0.262 | 0.858 |
| ILMN_1732720 | <i>LENG9</i>    | 59665067 | 0.675 | 0.544 | 0.416  | 0.233 | 0.958 | 0.237 | 0.071  | 0.684 | 0.409 |
| ILMN_1774982 | <i>CDC42EP5</i> | 59675413 | 0.690 | 0.382 | 0.197  | 0.142 | 0.716 | 0.705 | 0.950  | 0.863 | 0.820 |
| ILMN_2323933 | <i>LAIR2</i>    | 59706332 | 0.117 | 0.592 | 0.538  | 0.338 | 0.830 | 0.717 | 0.846  | 0.877 | 0.447 |
| ILMN_1807491 | <i>LAIR2</i>    | 59706378 | 0.975 | 0.560 | 0.525  | 0.254 | 0.644 | 0.443 | 0.249  | 0.857 | 0.699 |
| ILMN_1768819 | <i>KIR3DX1</i>  | 59748248 | 0.451 | 0.683 | 0.227  | 0.936 | 0.066 | 0.589 | 0.777  | 0.459 | 0.743 |
| ILMN_1716983 | <i>LILRA2</i>   | 59778160 | 0.491 | 0.032 | 0.189  | 0.648 | 0.865 | 0.311 | 0.274  | 0.401 | 0.813 |
| ILMN_1734748 | <i>LILRA1</i>   | 59798409 | 0.146 | 0.384 | 0.005  | 0.526 | 0.911 | 0.540 | 0.492  | 0.470 | 0.055 |
| ILMN_1708248 | <i>LILRB1</i>   | 59822729 | 0.396 | 0.111 | 0.463  | 0.527 | 0.643 | 0.579 | 0.057  | 0.442 | 0.614 |
| ILMN_2316974 | <i>LILRB1</i>   | 59823125 | 0.584 | 0.218 | 0.553  | 0.415 | 0.969 | 0.988 | 0.107  | 0.939 | 0.656 |
| ILMN_2355953 | <i>LILRB4</i>   | 59867107 | 0.473 | 0.297 | 0.869  | 0.346 | 0.963 | 0.194 | 0.741  | 0.361 | 0.920 |
| ILMN_1778974 | <i>LILRB4</i>   | 59868316 | 0.289 | 0.814 | 0.161  | 0.363 | 0.631 | 0.776 | 0.363  | 0.266 | 0.231 |
| ILMN_1733426 | <i>KIR3DL3</i>  | 59928720 | 0.517 | 0.640 | 1.000  | 0.821 | 0.863 | 0.559 | 0.906  | 0.436 | 0.032 |
| ILMN_2082593 | <i>KIR3DL3</i>  | 59929273 | 0.008 | 0.102 | 0.480  | 0.700 | 0.842 | 0.340 | 0.587  | 0.619 | 0.652 |
| ILMN_2402106 | <i>KIR2DL3</i>  | 59942155 |       |       |        | 0.324 | 0.866 | 0.095 | 0.105  | 0.459 | 0.689 |
| ILMN_1667232 | <i>KIR2DL3</i>  | 59942937 |       |       |        | 0.019 | 0.059 | 0.995 | 0.129  | 0.349 | 0.228 |
| ILMN_1678882 | <i>KIR2DL1</i>  | 59974324 | 0.733 | 0.817 | 0.814  | 0.462 | 0.240 | 0.276 | 0.203  | 0.370 | 0.922 |
| ILMN_1786810 | <i>KIR2DL1</i>  | 59974626 | 0.896 | 0.452 | 0.731  | 0.270 | 0.203 | 0.269 | 0.408  | 0.482 | 0.340 |
| ILMN_2390197 | <i>KIR2DL4</i>  | 60007796 | 0.813 | 0.119 | 0.075  | 0.745 | 0.543 | 0.530 | 0.231  | 0.456 | 0.037 |
| ILMN_1693207 | <i>KIR2DL4</i>  | 60008101 |       |       |        | 0.760 | 0.653 | 0.735 | 0.377  | 0.530 | 0.101 |
| ILMN_1739756 | <i>KIR2DL4</i>  | 60008300 |       |       |        | 0.012 | 0.117 | 0.701 | 0.252  | 0.647 | 0.954 |
| ILMN_1733245 | <i>KIR3DL1</i>  | 60020792 | 0.876 | 0.355 | 0.886  | 0.946 | 0.518 | 0.083 | 0.277  | 0.029 | 0.244 |
| ILMN_2131828 | <i>KIR3DL1</i>  | 60021307 | 0.213 | 0.309 | 0.516  | 0.843 | 0.892 | 0.442 | 0.821  | 0.449 | 0.137 |

|              |                 |          |       |       |       |       |       |       |       |       |       |
|--------------|-----------------|----------|-------|-------|-------|-------|-------|-------|-------|-------|-------|
| ILMN_2190842 | <i>KIR3DL2</i>  | 60055232 | 0.670 | 0.261 | 0.411 | 0.448 | 0.679 | 0.171 | 0.105 | 0.678 | 0.472 |
| ILMN_2379967 | <i>FCAR</i>     | 60077519 | 0.295 | 0.370 | 0.187 | 0.359 | 0.443 | 0.089 | 0.642 | 0.911 | 0.507 |
| ILMN_2365091 | <i>FCAR</i>     | 60077541 |       |       |       | 0.198 | 0.008 | 0.904 | 0.511 | 0.990 | 0.888 |
| ILMN_2279367 | <i>FCAR</i>     | 60078816 |       |       |       | 0.800 | 0.985 | 0.678 | 0.509 | 0.043 | 0.896 |
| ILMN_1750761 | <i>NCR1</i>     | 60110290 | 0.021 | 0.133 | 0.100 | 0.516 | 0.417 | 0.067 | 0.047 | 0.804 | 0.982 |
| ILMN_1652366 | <i>NLRP7</i>    | 60147578 | 0.746 | 0.391 | 0.366 | 0.161 | 0.368 | 0.736 | 0.340 | 0.851 | 0.233 |
| ILMN_1798063 | <i>NLRP7</i>    | 60147841 | 0.866 | 0.659 | 0.689 | 0.652 | 0.289 | 0.117 | 0.745 | 0.908 | 0.394 |
| ILMN_1658632 | <i>NLRP7</i>    | 60148662 | 0.315 | 0.357 | 0.135 | 0.312 | 0.498 | 0.178 | 0.820 | 0.505 | 0.503 |
| ILMN_1664878 | <i>NLRP2</i>    | 60172608 | 0.240 | 0.745 | 0.195 | 0.122 | 0.809 | 0.035 | 0.136 | 0.500 | 0.879 |
| ILMN_2223772 | <i>GP6</i>      | 60239341 |       |       |       | 0.022 | 0.505 | 0.817 | 0.108 | 0.562 | 0.729 |
| ILMN_1732269 | <i>GP6</i>      | 60239966 | 0.470 | 0.955 | 0.983 | 0.066 | 0.503 | 0.249 | 0.104 | 0.257 | 0.847 |
| ILMN_1660723 | <i>RDH13</i>    | 60270915 | 0.891 | 0.868 | 0.303 | 0.384 | 0.099 | 0.404 | 0.425 | 0.760 | 0.624 |
| ILMN_1681193 | <i>EPS8L1</i>   | 60275218 | 0.416 | 0.447 | 0.299 | 0.951 | 0.218 | 0.357 | 0.532 | 0.681 | 0.762 |
| ILMN_1662950 | <i>EPS8L1</i>   | 60275322 | 0.943 | 0.241 | 0.763 | 0.981 | 0.393 | 0.317 | 0.304 | 0.775 | 0.634 |
| ILMN_1671600 | <i>EPS8L1</i>   | 60277429 | 0.651 | 0.306 | 0.912 | 0.503 | 0.595 | 0.075 | 0.676 | 0.079 | 0.152 |
| ILMN_1659522 | <i>EPS8L1</i>   | 60286742 |       |       |       | 0.701 | 0.156 | 0.305 | 0.505 | 0.670 | 0.924 |
| ILMN_1685286 | <i>LENG3</i>    | 60318143 | 0.861 | 0.367 | 0.229 | 0.700 | 0.956 | 0.579 | 0.575 | 0.877 | 0.688 |
| ILMN_2115991 | <i>TNNT1</i>    | 60351761 | 0.820 | 0.373 | 0.302 | 0.031 | 0.736 | 0.304 | 0.746 | 0.138 | 0.051 |
| ILMN_1768637 | <i>TNNI3</i>    | 60360285 | 0.540 | 0.706 | 0.168 | 0.851 | 0.370 | 0.430 | 0.517 | 0.525 | 0.669 |
| ILMN_1772074 | <i>C19orf51</i> | 60367793 | 0.662 | 0.678 | 0.632 | 0.592 | 0.427 | 0.531 | 0.766 | 0.538 | 0.177 |
| ILMN_1755571 | <i>SYT5</i>     | 60381988 | 0.503 | 0.181 | 0.012 | 0.337 | 0.631 | 0.127 | 0.405 | 0.487 | 0.855 |
| ILMN_1741465 | <i>PTPRH</i>    | 60409125 | 0.049 | 0.532 | 0.020 | 0.521 | 0.279 | 0.233 | 0.851 | 0.970 | 0.177 |
| ILMN_2049417 | <i>TMEM86B</i>  | 60430902 | 0.875 | 0.845 | 0.786 | 0.562 | 0.814 | 0.899 | 0.738 | 0.935 | 0.483 |
| ILMN_1794085 | <i>SAPS1</i>    | 60458773 |       |       |       | 0.549 | 0.156 | 0.628 | 0.347 | 0.754 | 0.892 |
| ILMN_1678949 | <i>HSPBP1</i>   | 60482754 | 0.442 | 0.733 | 0.791 | 0.518 | 0.758 | 0.251 | 0.389 | 0.825 | 0.661 |
| ILMN_1769902 | <i>HSPBP1</i>   | 60482756 | 0.462 | 0.742 | 0.690 | 0.327 | 0.506 | 0.345 | 0.532 | 0.208 | 0.299 |
| ILMN_2185845 | <i>BRSK1</i>    | 60490150 | 0.951 | 0.773 | 0.983 | 0.230 | 0.243 | 0.731 | 0.332 | 0.535 | 0.041 |

<sup>a</sup>eQTL analysis for rs817826 and rs103294 with mRNA expression of nearby genes within 1 Mb of either the 5' or 3' end of the specified SNPs in three cell types (T-cell, fibroblast and lymphoblastoid cell line) of 75 Geneva individuals and three tissue types (166 adipose, 156 LCL and 160 skin samples) of healthy female twins (Twins 1 and 2).

Supplementary Table 9. *LILRA3* deletion distribution and association with prostate cancer risk among Chinese men

| Status <sup>a</sup> | Cases (n=1,304) |      | Controls (n=991) |      | OR(95%CI) <sup>b</sup> | P <sup>b</sup>        |
|---------------------|-----------------|------|------------------|------|------------------------|-----------------------|
|                     | n               | %    | n                | %    |                        |                       |
| Del/Del             | 629             | 48.2 | 558              | 56.3 | Ref.                   |                       |
| Del/Non-del         | 550             | 42.2 | 367              | 37.0 | 1.26(1.07-1.51)        | 8.68×10 <sup>-3</sup> |
| Non-del/Non-del     | 125             | 9.6  | 66               | 6.7  | 1.57(1.14-2.18)        | 6.04×10 <sup>-3</sup> |
| Non-del allele      |                 | 30.7 |                  | 25.2 | 1.25(1.10-1.43)        | 9.60×10 <sup>-4</sup> |

<sup>a</sup> “Del” represents deleted allele of *LILRA3*; “Non-del” represents non-deleted allele of *LILRA3*; <sup>b</sup> Odds ratios (ORs), 95% confidence intervals (95% CIs) and corresponding *P* values were estimated using a logistic regression model.

Supplementary Table 10. *LILRA3* mRNA expression in prostate tissues

|                   | Mean and standard deviation (SD) of Ct number <sup>a</sup> |              |                 |
|-------------------|------------------------------------------------------------|--------------|-----------------|
|                   | Del/Del                                                    | Del/Non-Del  | Non-Del/Non-Del |
| Number of samples | 36                                                         | 35           | 9               |
| <i>LILRA3</i>     | 36.34 (0.26)                                               | 34.20 (0.49) | 34.97 (0.63)    |
| <i>β-ACTIN</i>    | 21.09 (0.29)                                               | 21.06 (0.29) | 21.70 (0.53)    |

<sup>a</sup> Among the total of 36 samples that harbored a homozygous deletion (Del/Del), expression of the *LILRA3* mRNA was detected in 6 samples with Ct (cycle threshold) values >36 after 45 PCR cycles. For 35 samples that were heterozygous for the deletion (Del/Non-Del), mRNA was detectable among 26 with Ct values of  $34.20 \pm 0.49$ . Among the 9 samples that carried no deletions, mRNA was detected in all samples with Ct values at  $34.97 \pm 0.63$ . The mRNA for the reference gene of *β-ACTIN* was successfully detected; the mean Ct numbers were  $21.09 \pm 0.29$ ,  $21.06 \pm 0.29$ , and  $21.70 \pm 0.53$ , respectively, for samples with homozygous deletion, heterozygous deletion, and homozygous non-deletion type.

Supplementary Table 11. Primers for mRNA expression measurement of *LILRA3* using a real-time quantitative PCR assay

| Primer  | Oligo sequence                     |
|---------|------------------------------------|
| Forward | 5' - GCGCCAATCTCATAAGTACCAGGCTG-3' |
| Reverse | 5' - CCAGCCTTGGAGTCGGA CTGTT-3'    |

Supplementary Fig. 1. Principal components analysis determination of ethnicity. The first two principal components for each individual were plotted: the relatedness between the 1,417 cases and 1,008 controls, along with the European (CEU), African (YRI), Chinese (CHB), and Japanese (JPT) data from the HapMap project was analyzed.

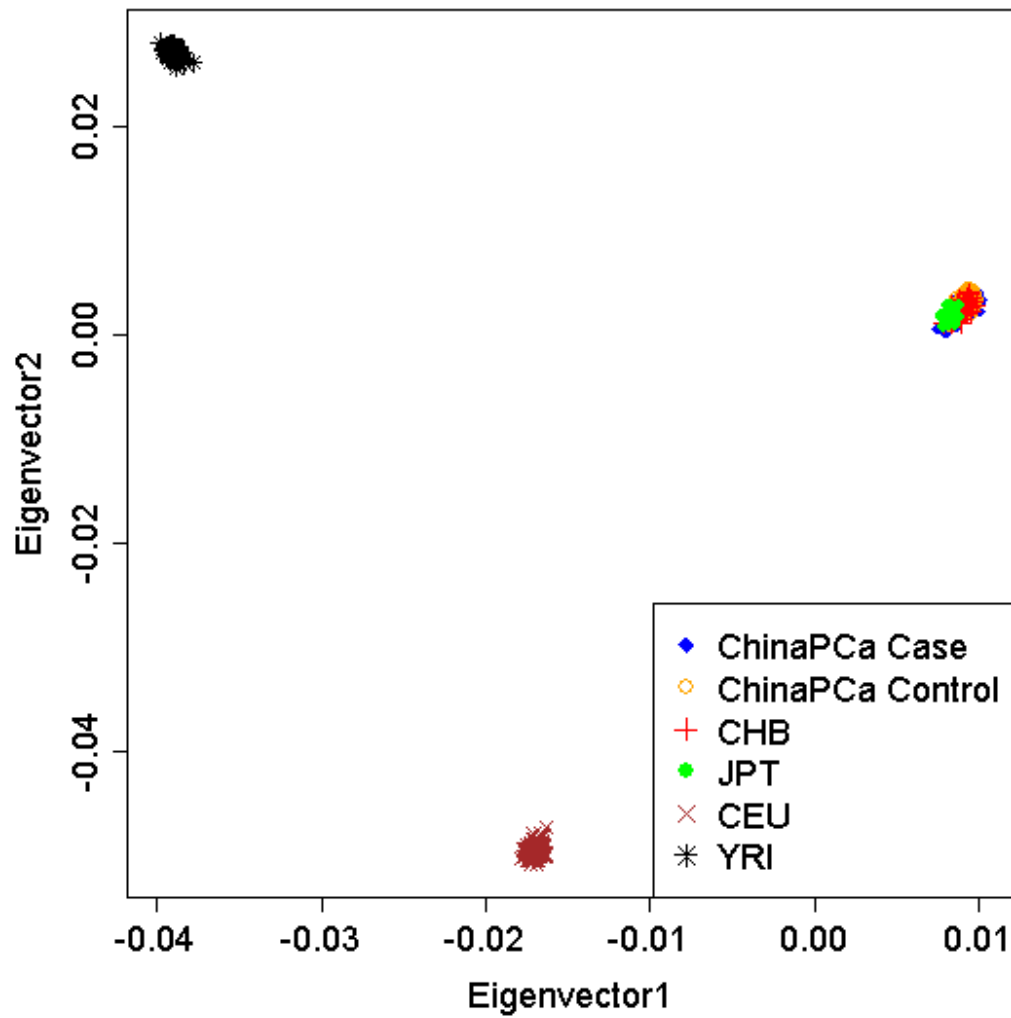

Supplementary Fig. 2. Principal component analysis between cases and controls.

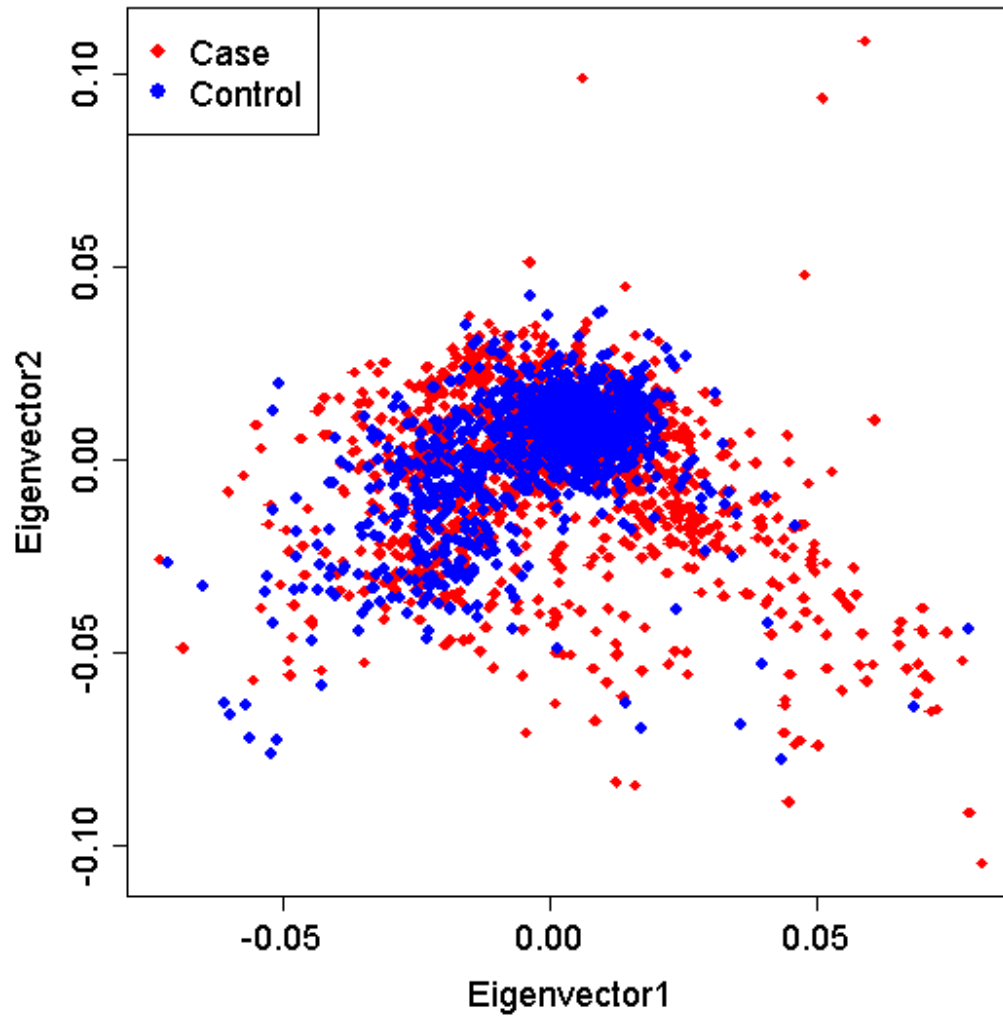



Supplementary Fig. 3. Quantile-quantile plots and genomic inflation factors ( $\lambda$ ) for associations with prostate cancer risk, with observed  $P$  values plotted as a function of theoretical  $P$  values.

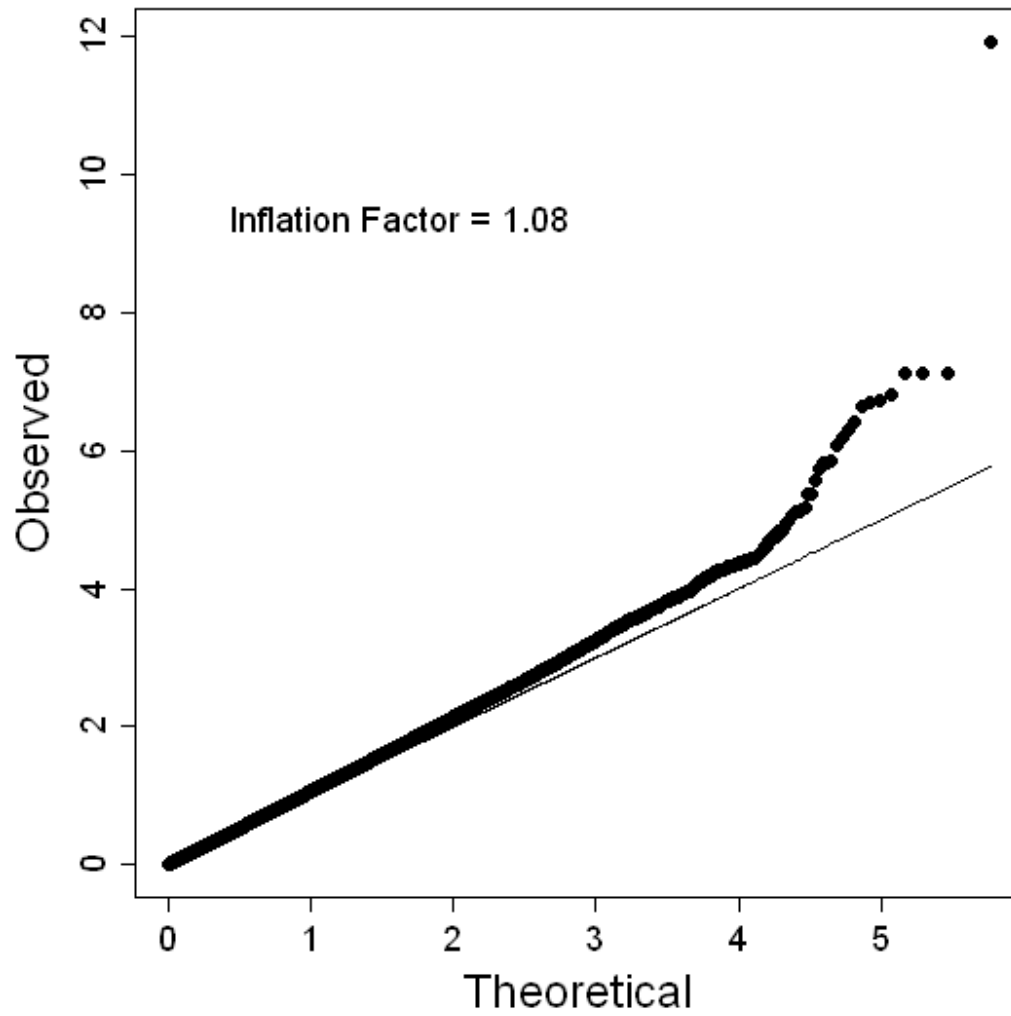

Supplementary Fig. 4. Manhattan plot of the strength of association ( $-\log_{10}(P)$  values; Y-axis) between SNPs (X-axis by chromosome and chromosomal position) and prostate cancer risk.

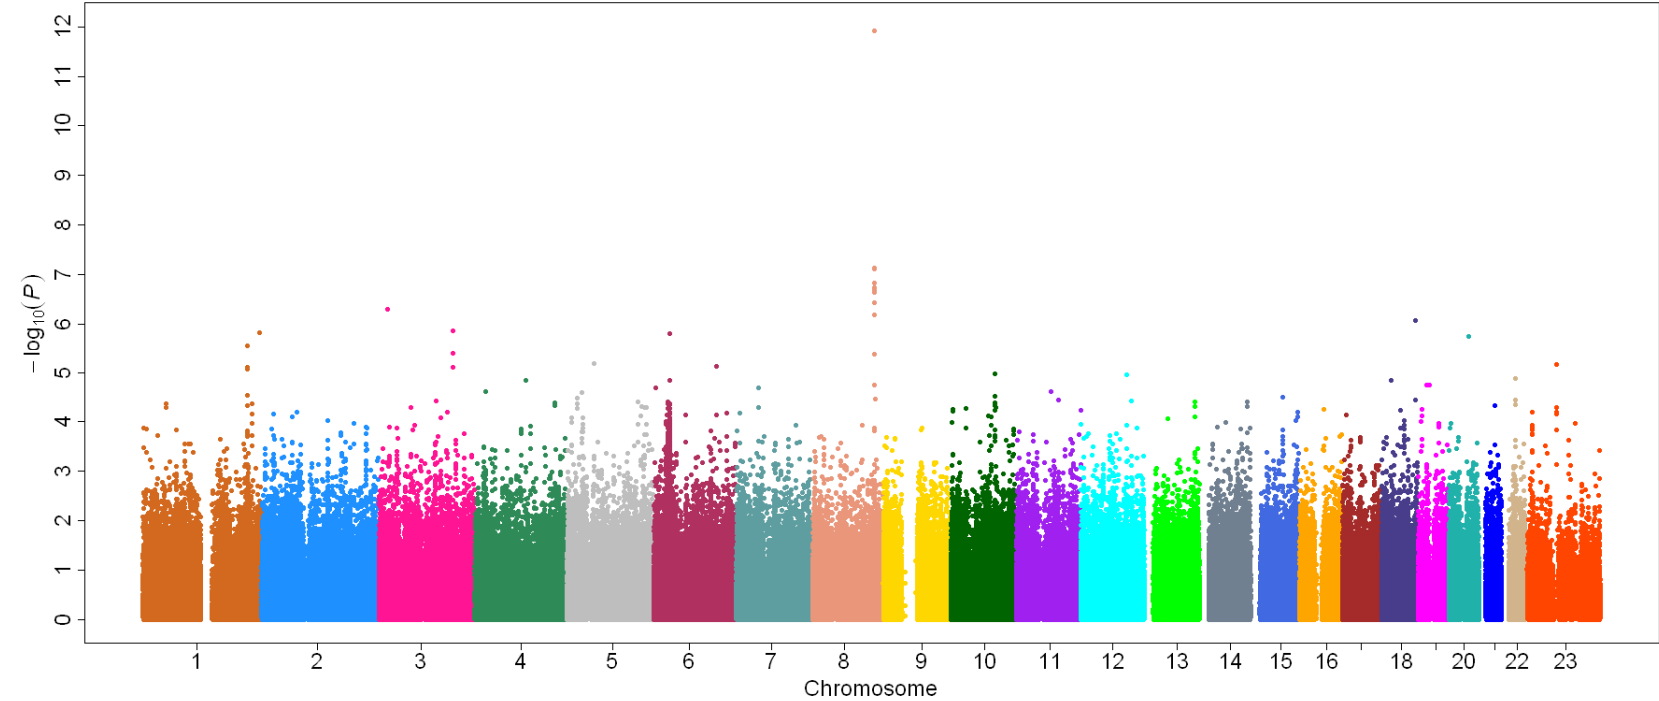

Supplementary Fig. 5. Distribution of PSA levels among GWAS and Replication I controls by genotypes of rs817826 (a, GWAS; b, Replication I) and rs103294 (c, GWAS; d, Replication I).

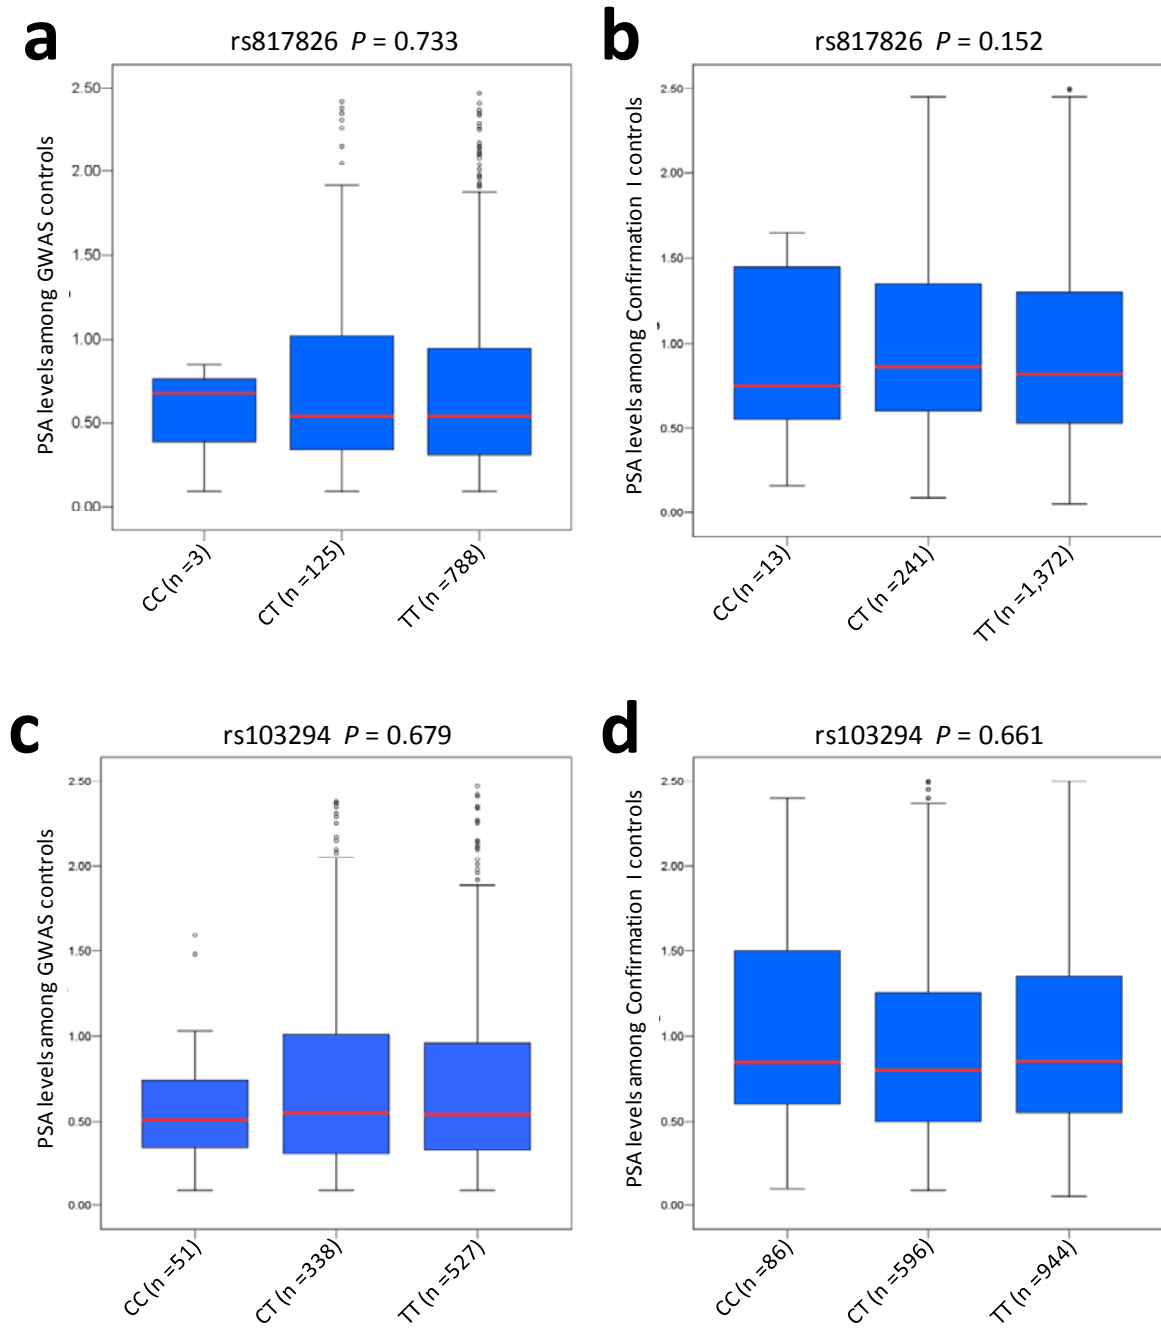

Supplementary Fig. 6. Expression quantitative trait loci (eQTL) analysis for rs103294 at 19q13.4 with mRNA expression of *LILRA3*. The mRNA expression of *LILRA3* was measured in three cell types (T-cell, fibroblast and lymphoblastoid cell line) of 75 Geneva individuals and three tissue types (166 adipose, 156 LCL and 160 skin samples) of healthy female twins (Twins 1 and 2) by two array probes, ILMN\_166631 (a) and ILMN\_1786303 (b) on exons 7 and 6, respectively.

**a**

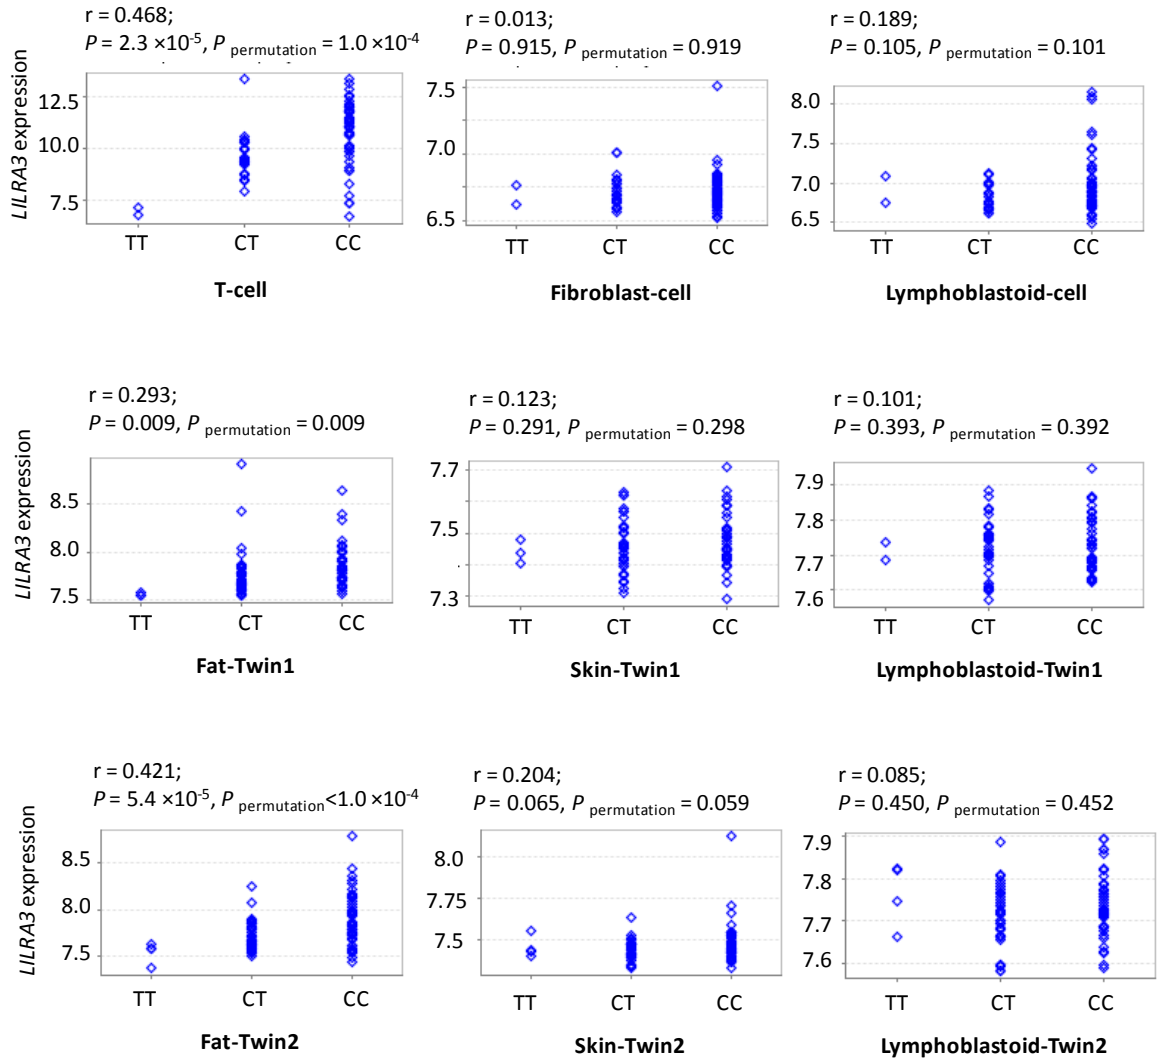

**b**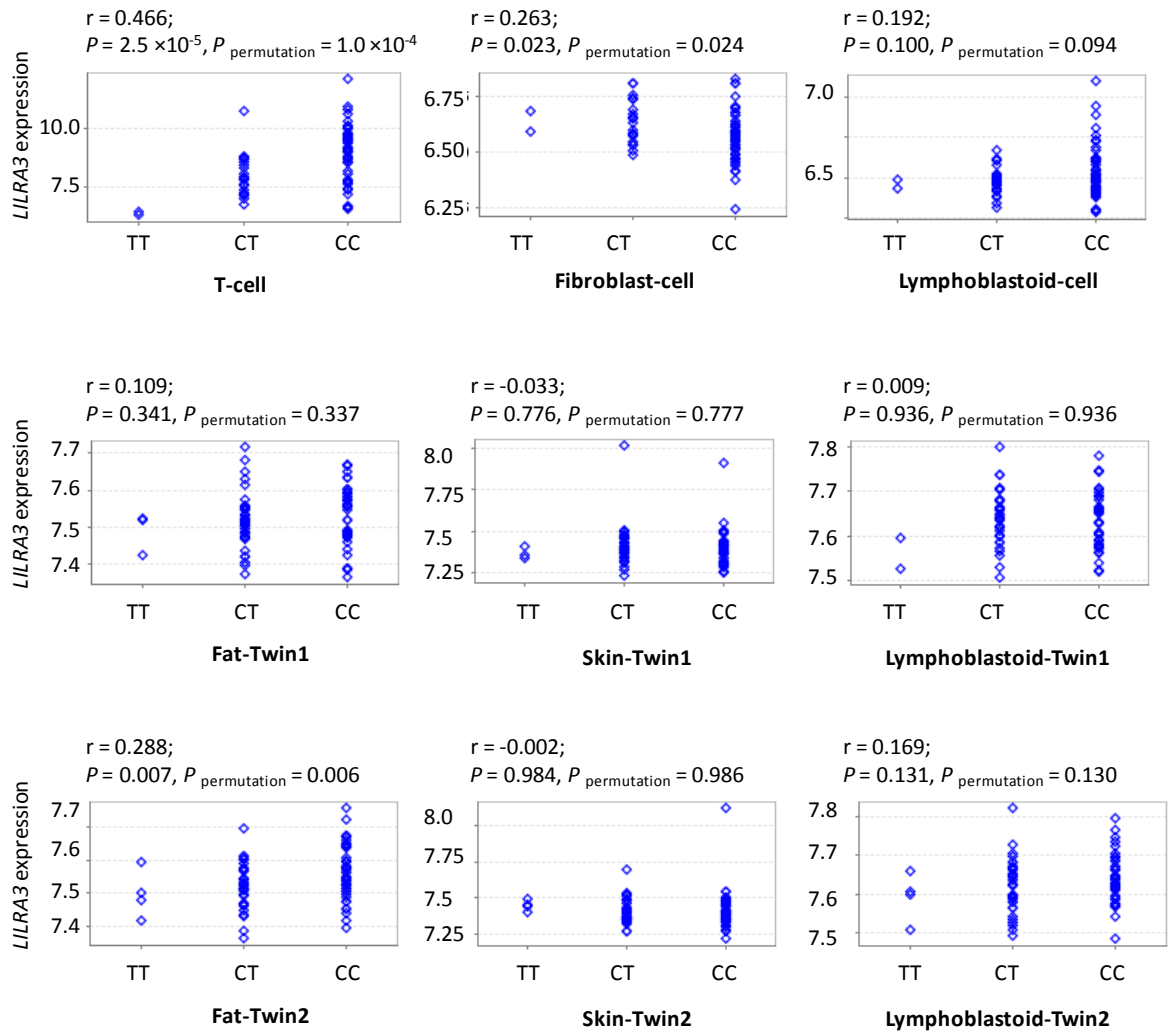

Supplementary Figure 7. Functional annotation of the genetic locus on 9q31 based on UCSC genome browser.

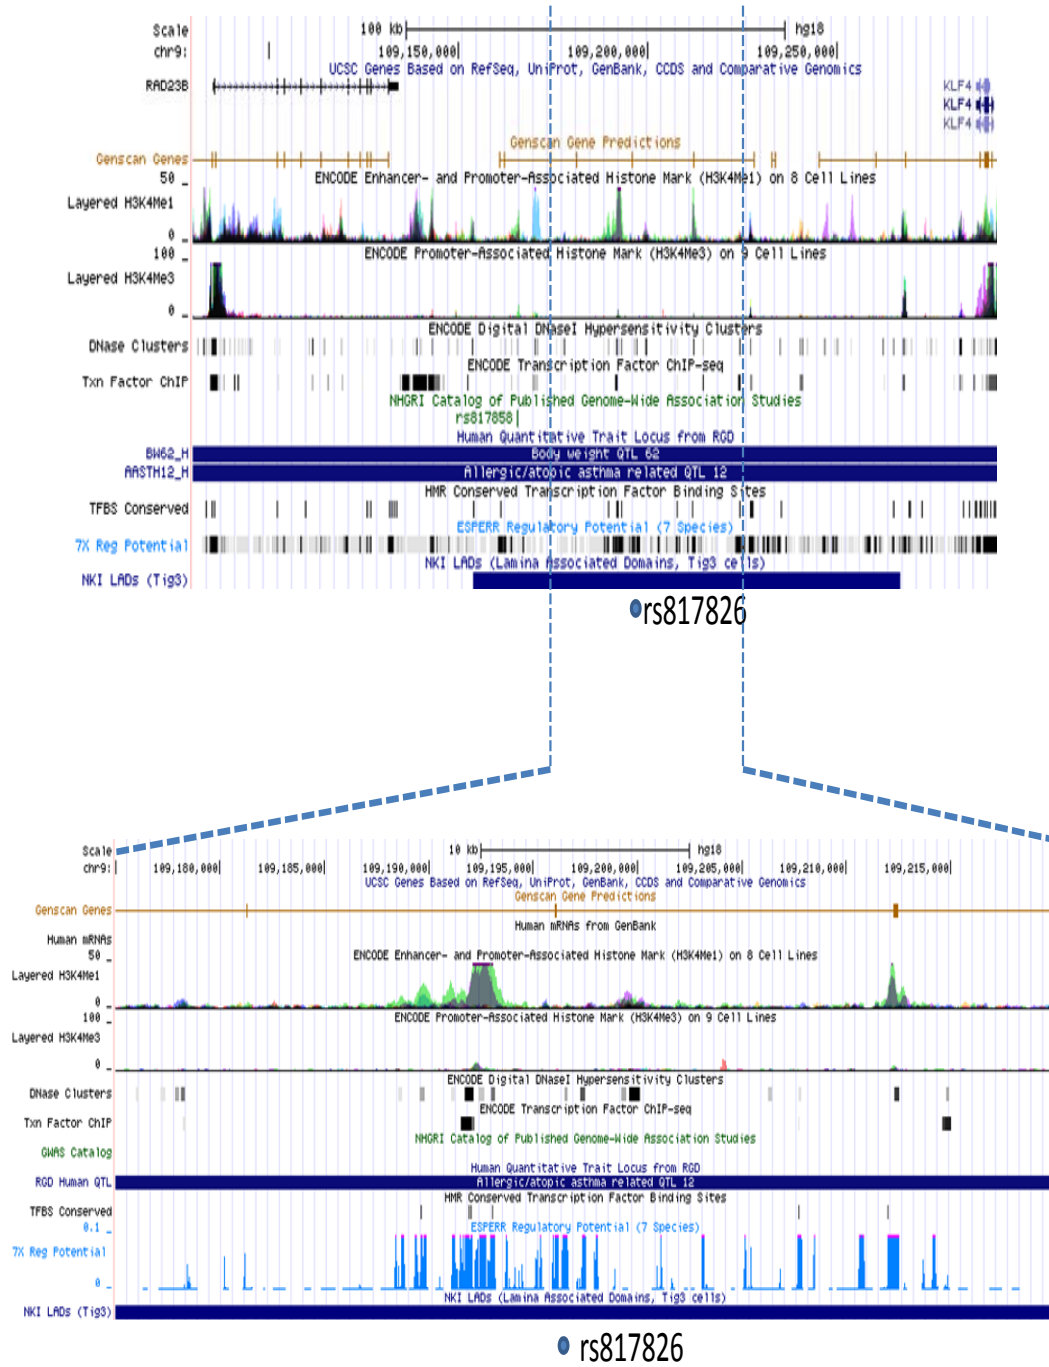

Supplement: NIHMS605163-supplement-Supp_data.pdf [file NIHMS605163-supplement-Supp_data.pdf]
